# Supplementary material for: 3-Aryl-5-aminobiphenyl Substituted [1,2,4]triazolo[4,3-c]quinazolines: Synthesis and Photophysical Properties
Source: MDPI journal article supplement (doi:10.3390/molecules28041937), 2023-02-17
Supplement: s1 [file s1]

# 3-Aryl-5-aminobiphenyl substituted [1,2,4]triazolo[4,3-c]quinazolines: synthesis and photophysical properties

Alexandra E. Kopotilova, Tatyana N. Moshkina, Emiliya V. Nosova, Galina N. Lipunova, Ekaterina S. Starnovskaya, Dmitry S. Kopchuk, Grigory A. Kim, Vasiliy S. Gaviko, Pavel A. Slepukhin and Valery N. Charushin

## CONTENTS

|                                                                                                       |    |
|-------------------------------------------------------------------------------------------------------|----|
| 1. NMR and mass spectra of 3-aryl-5-aminobiphenyl substituted [1,2,4]triazolo[4,3-c]quinazolines..... | 2  |
| 2. Crystallographic data of compounds <b>2a</b> and <b>2e</b> .....                                   | 21 |
| 3. Absorption and emission spectra of fluorophores in toluene and MeCN.....                           | 26 |
| 4. Emission spectra of fluorophores in solid state .....                                              | 39 |
| 5. Solvatochromic study for compounds <b>2</b> .....                                                  | 40 |
| 6. Absorption and emission behavior of compounds <b>2</b> in MeCN/water mixture .....                 | 43 |
| 7. Absorption and fluorescence behavior of compounds <b>2e</b> and <b>2h</b> in acidic media.....     | 48 |

1. NMR and mass spectra of 3-aryl-5-aminobiphenyl substituted [1,2,4]triazolo[4,3-c]quinazolines

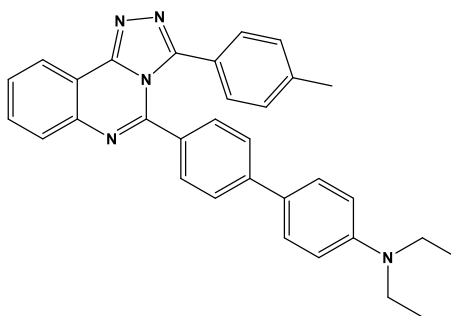

2a

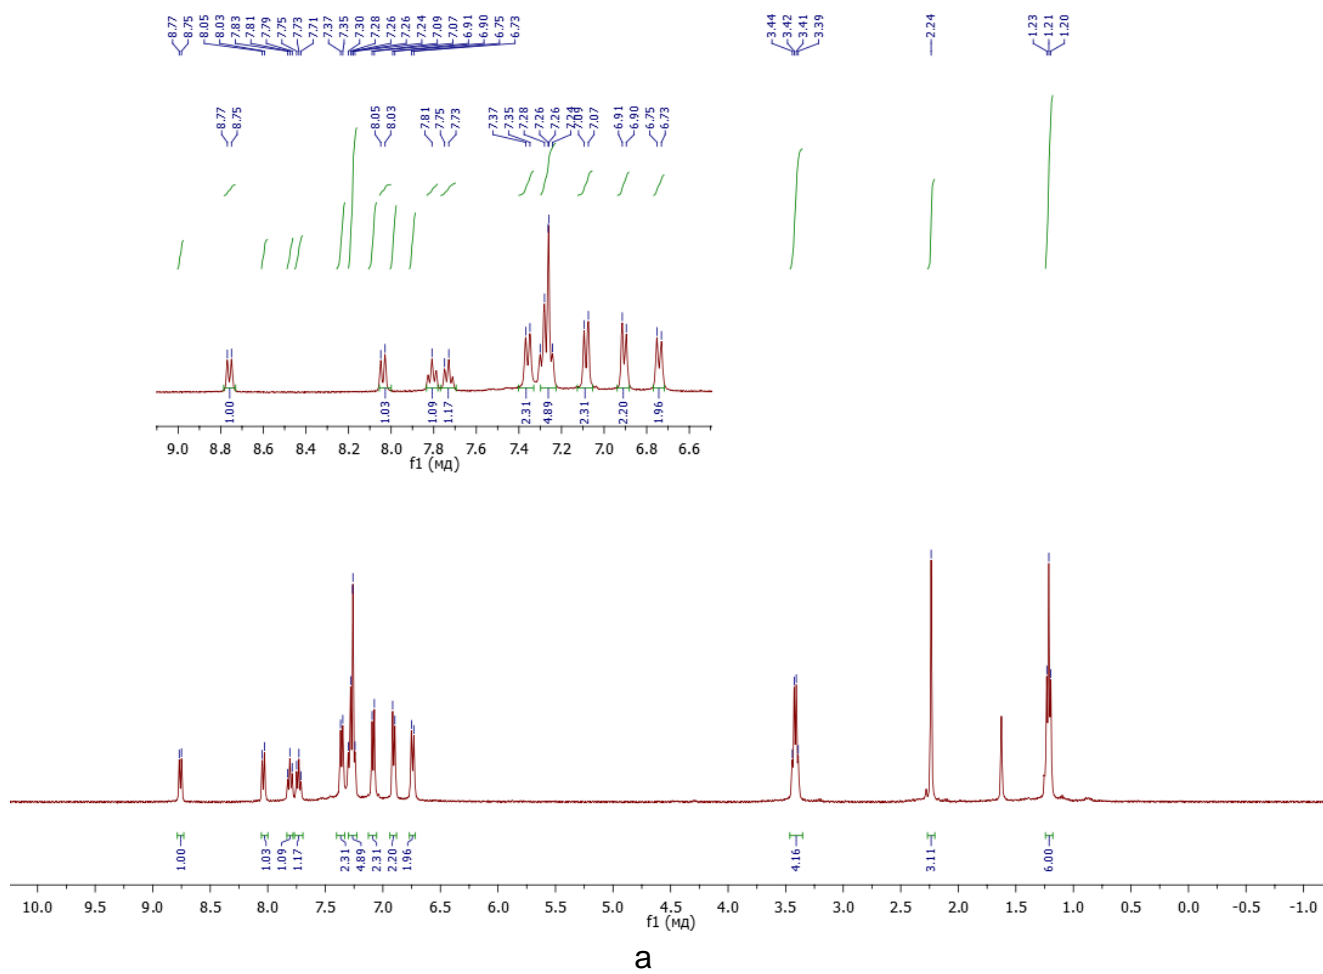

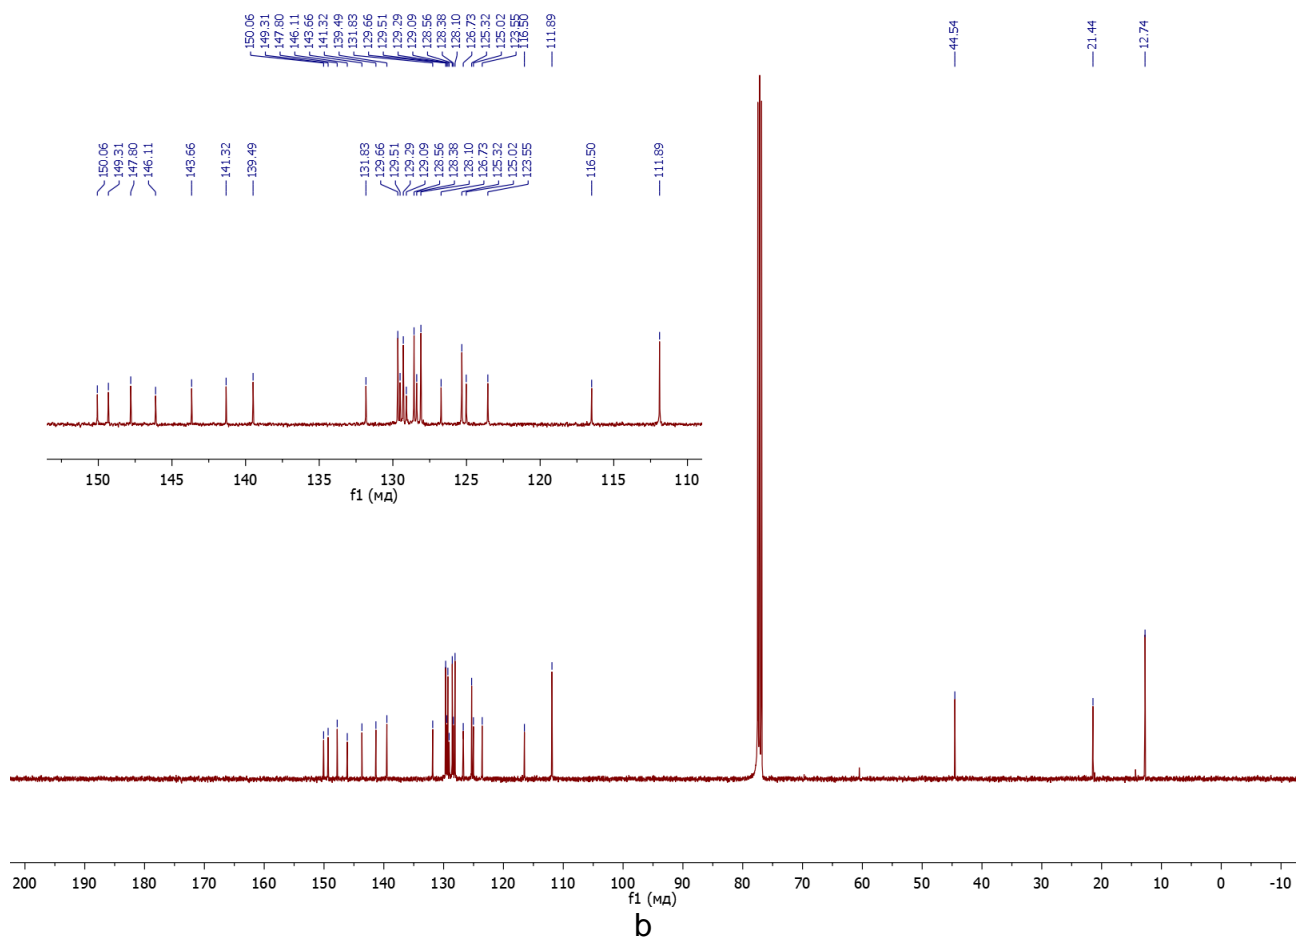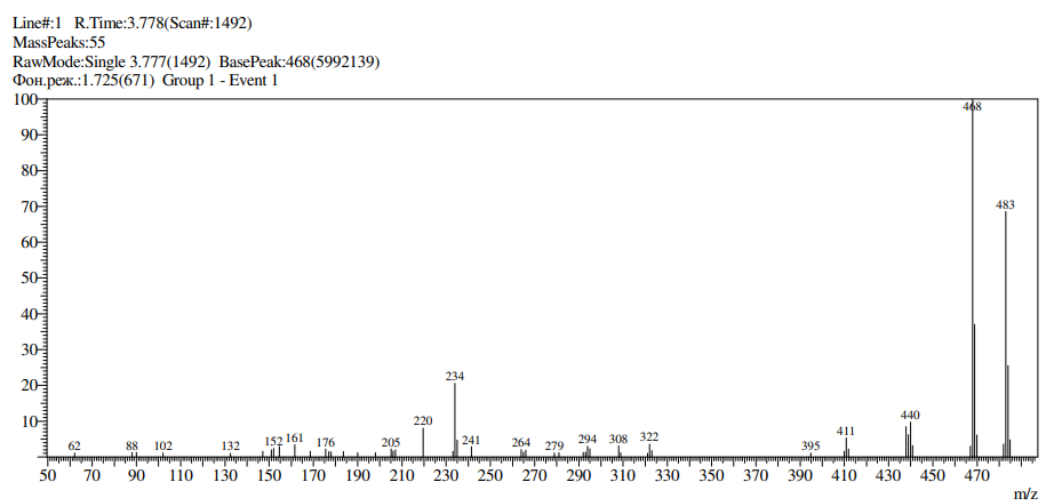

**Figure S1.**  $^1\text{H}$  NMR spectrum (a) and  $^{13}\text{C}$  NMR spectrum in  $\text{CDCl}_3$  (b); mass spectrum (c) of **2a**.

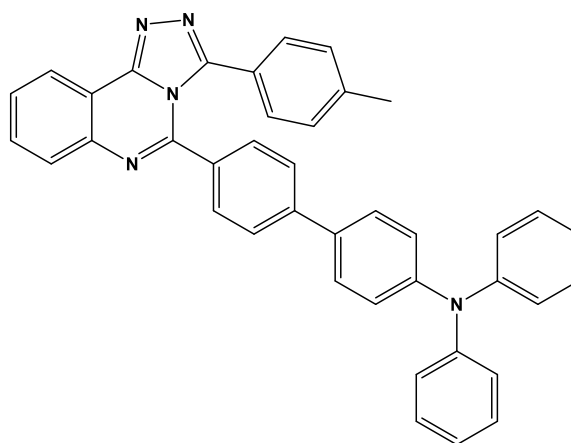

**2b**

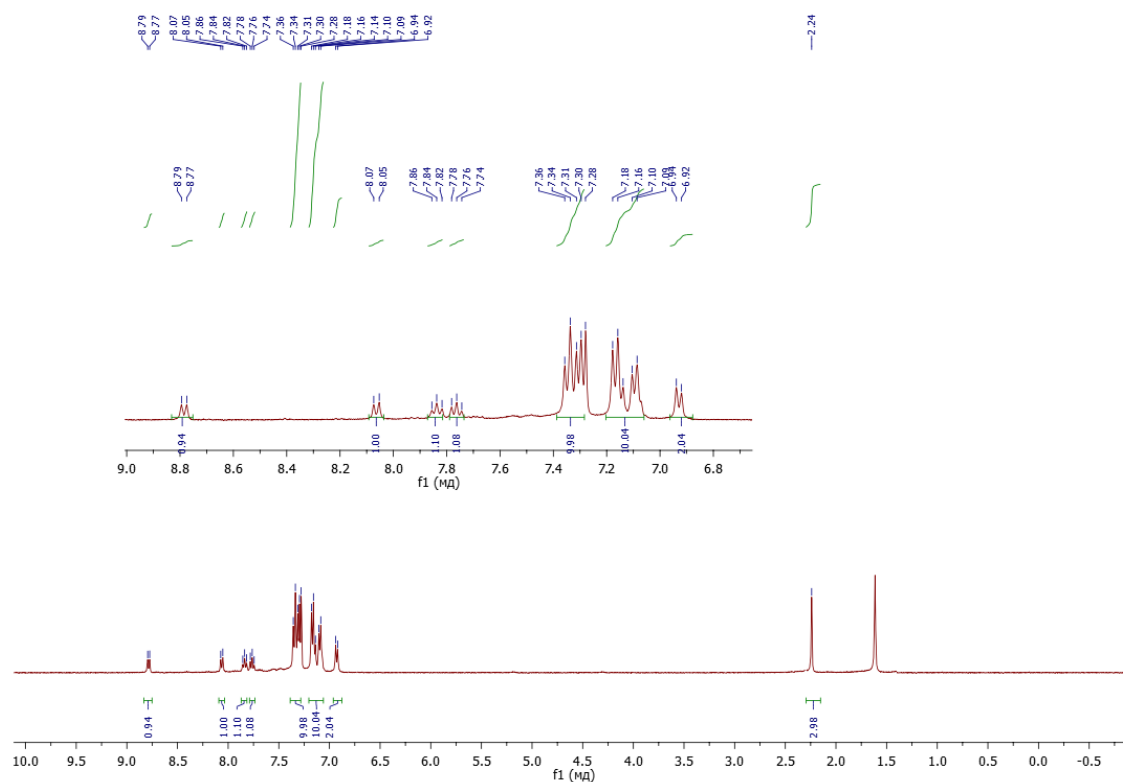

**a**

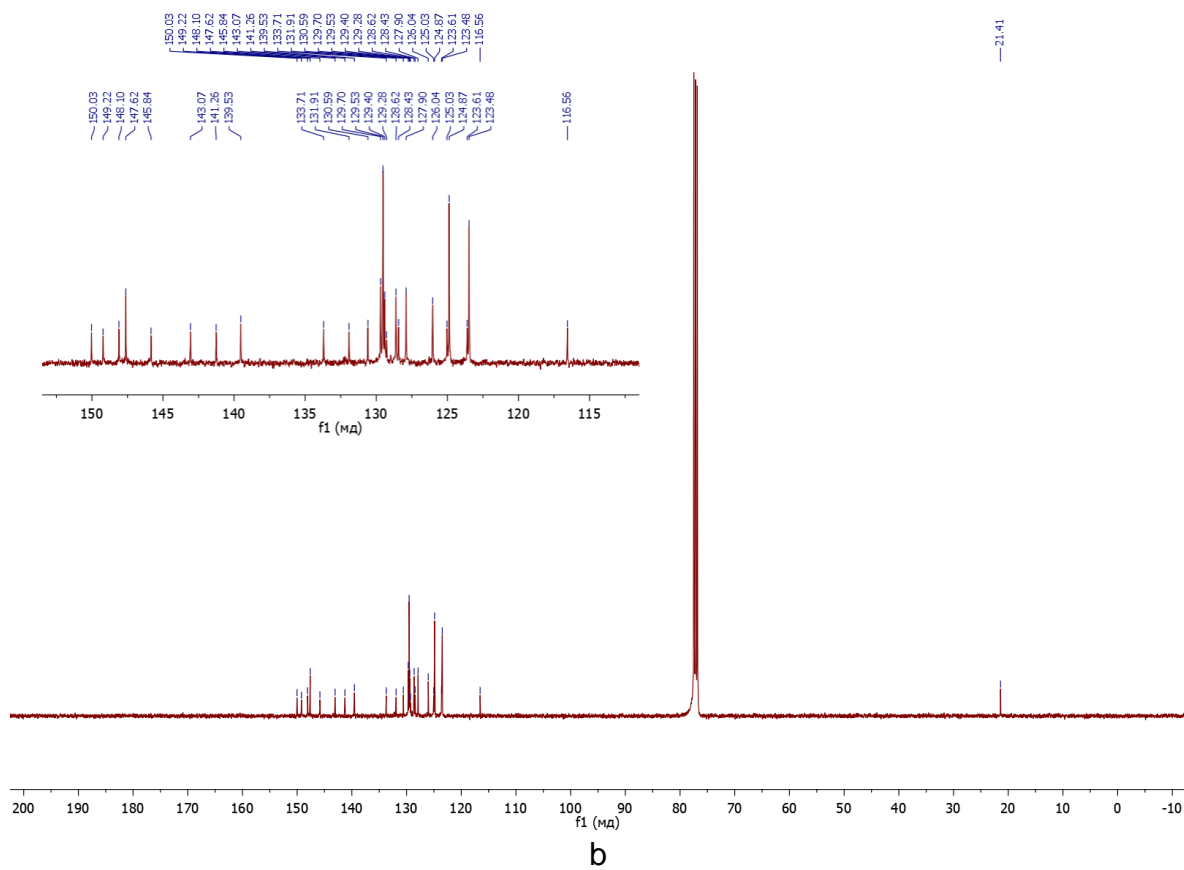

Line#1 R.Time:4.265(Scan#:1687)  
 MassPeaks:22  
 RawMode:Single 4.265(1687) BasePeak:579(2691404)  
 Фон.реж.:2.605(1023) Group 1 - Event 1

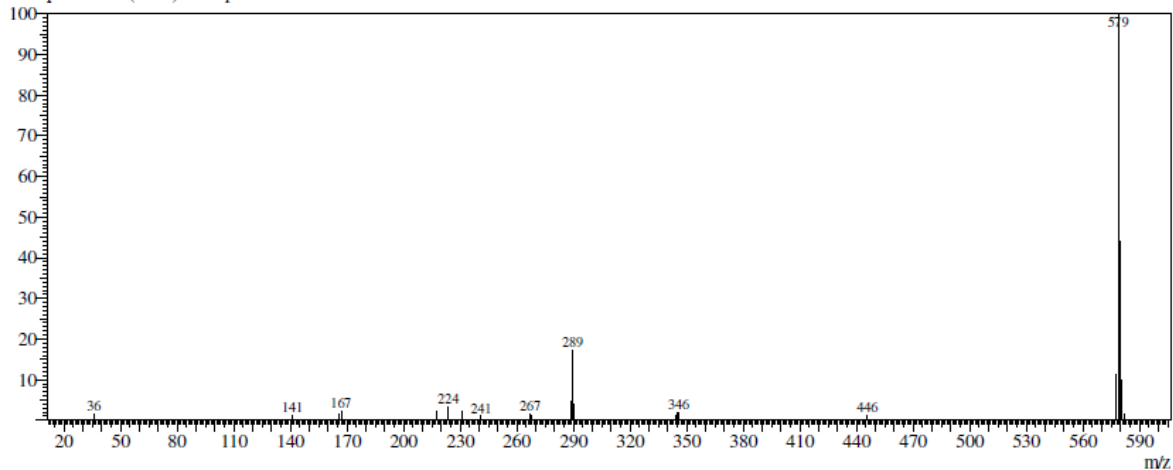

**Figure S2.**  $^1\text{H}$  NMR spectrum (a) and  $^{13}\text{C}$  NMR spectrum in  $\text{CDCl}_3$  (b); mass spectrum (c) of **2b**.

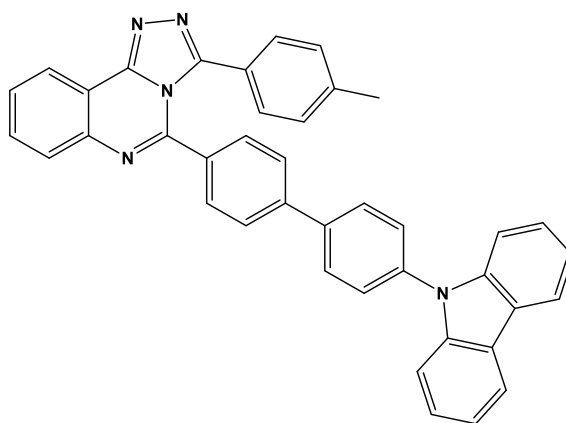

**2c**

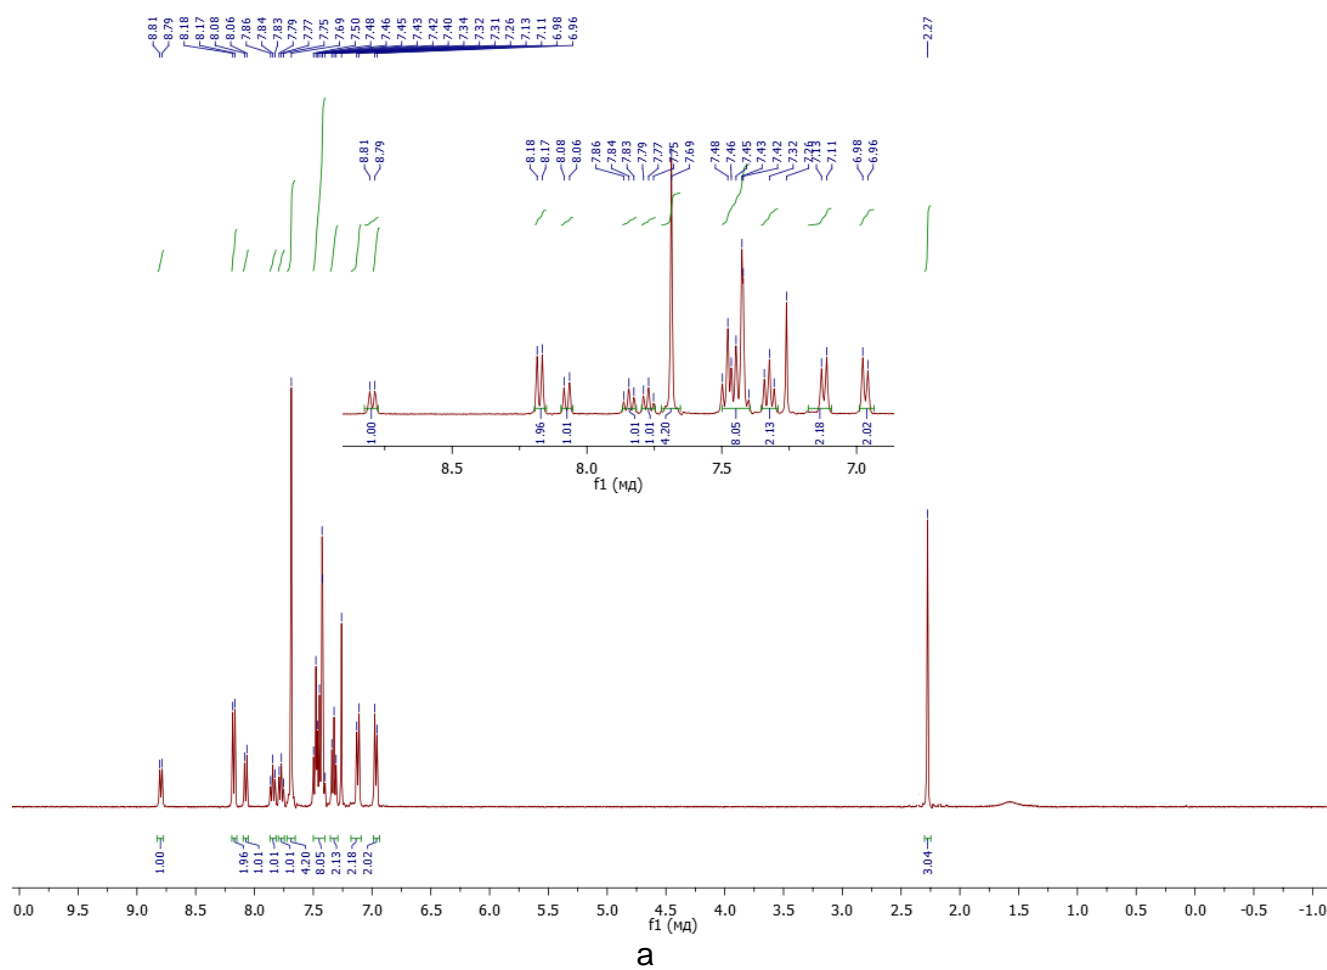

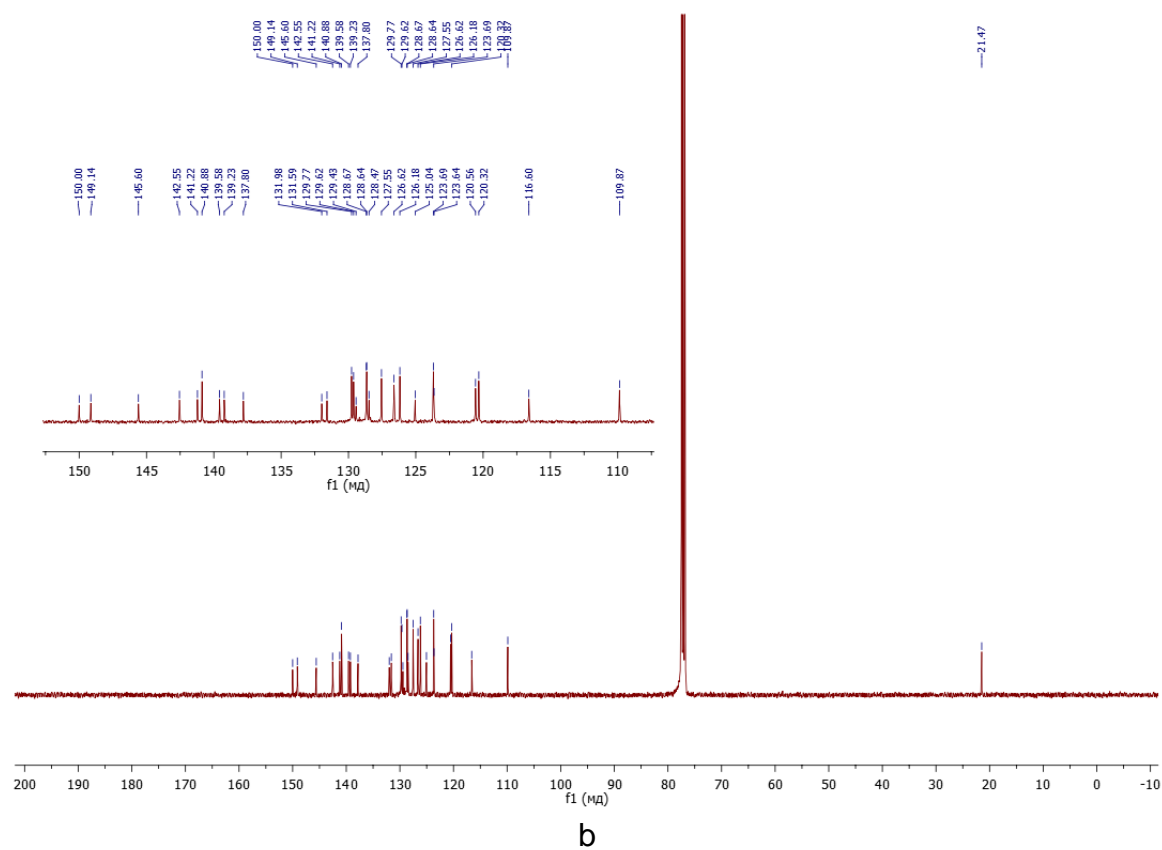

Line#1 RTime:5.368(Scan#:2108)

MassPeaks:254

RawMode:Single 5.367(2108) BasePeak:577(93705)

Фон.реш.:3.658(1424) Group 1 - Event 1

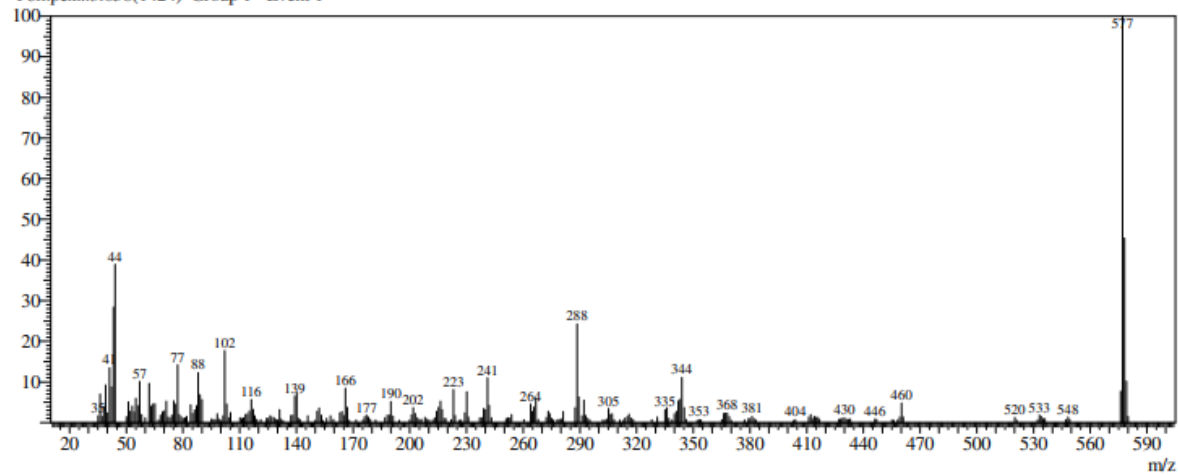

**Figure S3.**  $^1\text{H}$  NMR spectrum in  $\text{CDCl}_3$  (a) and  $^{13}\text{C}$  NMR spectrum in  $\text{CDCl}_3$  (b); mass spectrum (c) of **2c**.

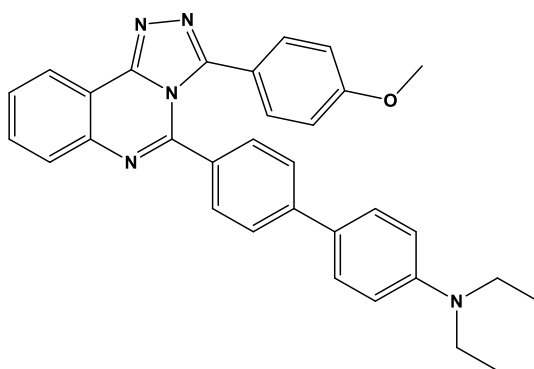

**2d**

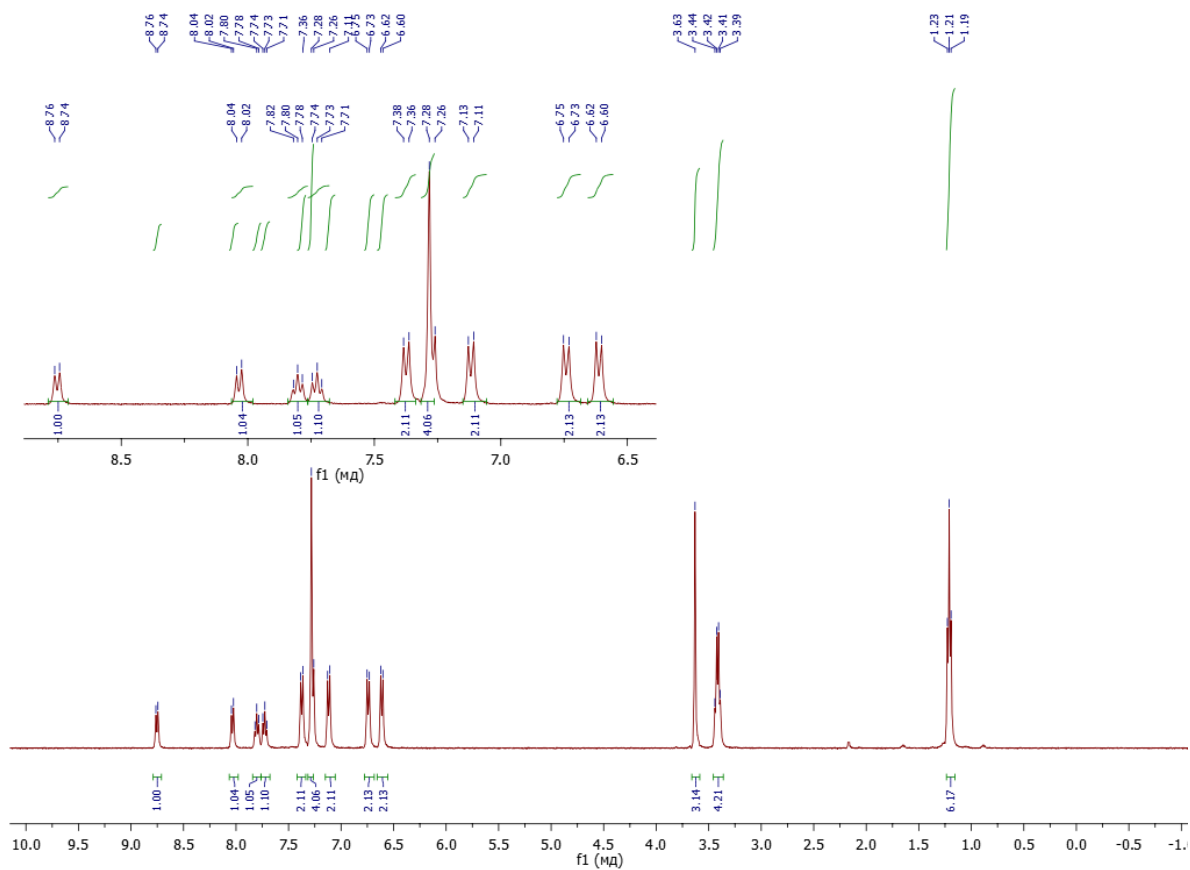

**a**

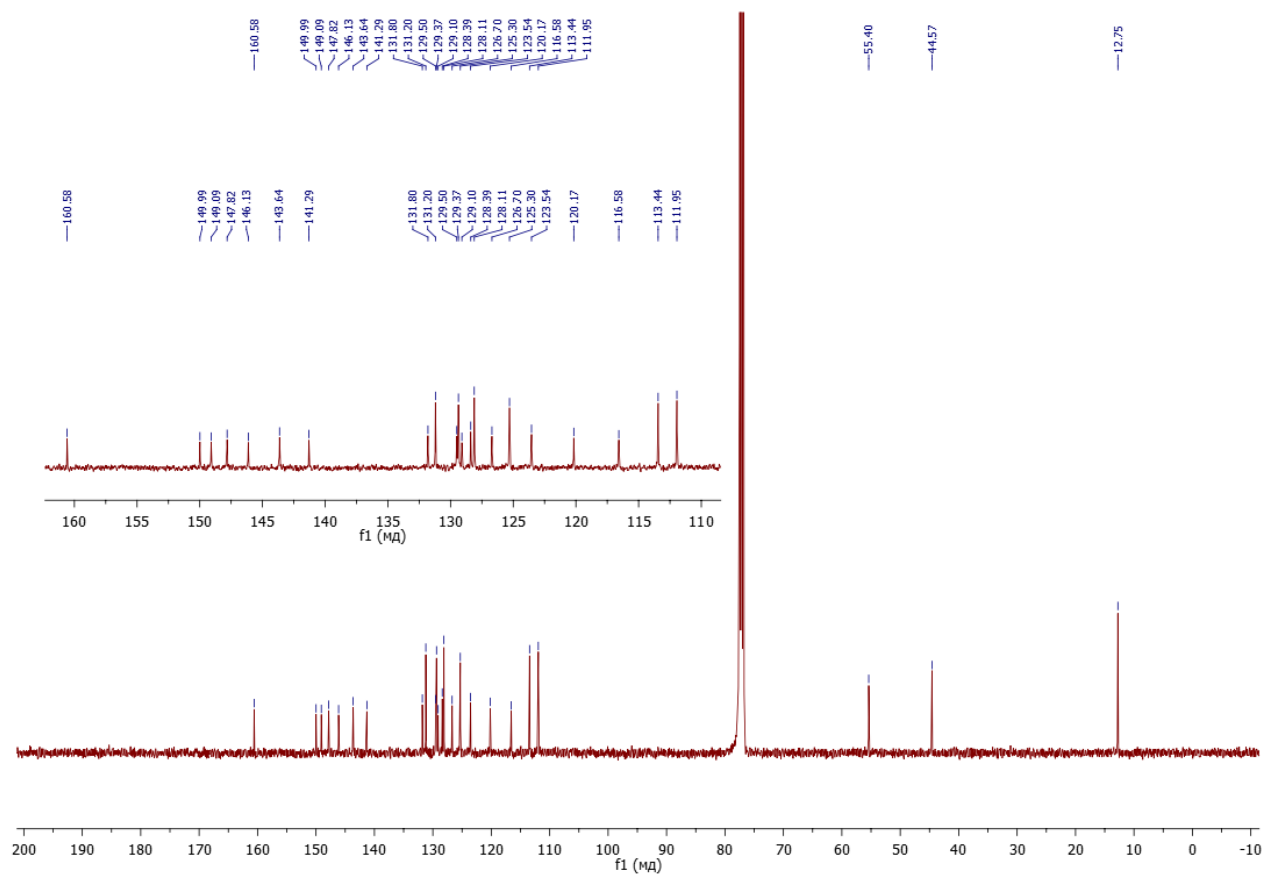

b

Line#:1 R.Time:3.813(Scan#:1506)

MassPeaks:120

RawMode:Single 3.813(1506) BasePeak:484(1114634)

Фон.пик.:1.533(594) Group 1 - Event 1

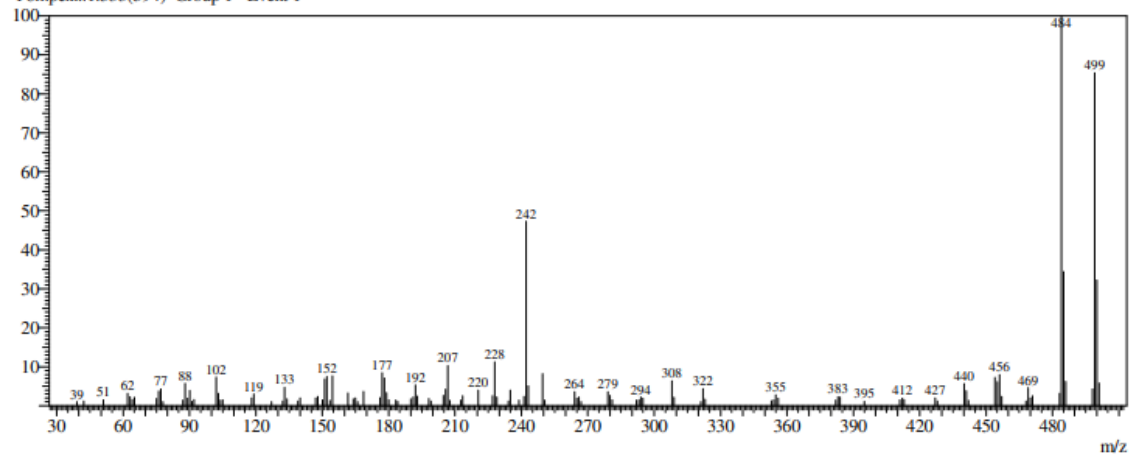

c

**Figure S4.**  $^1\text{H}$  NMR spectrum in  $\text{CDCl}_3$  (a) and  $^{13}\text{C}$  NMR spectrum in  $\text{CDCl}_3$  (b); mass spectrum (c) of **2d**.

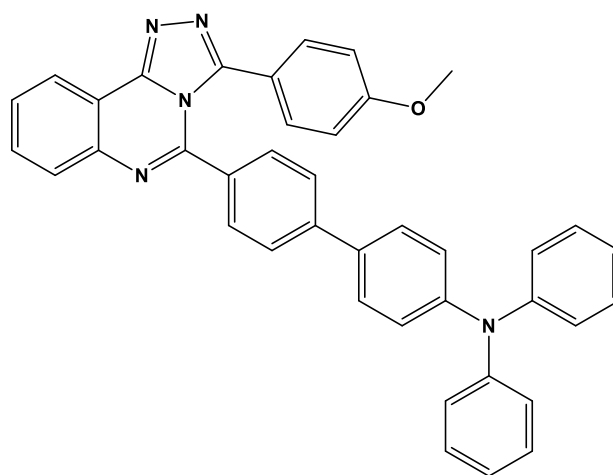

**2e**

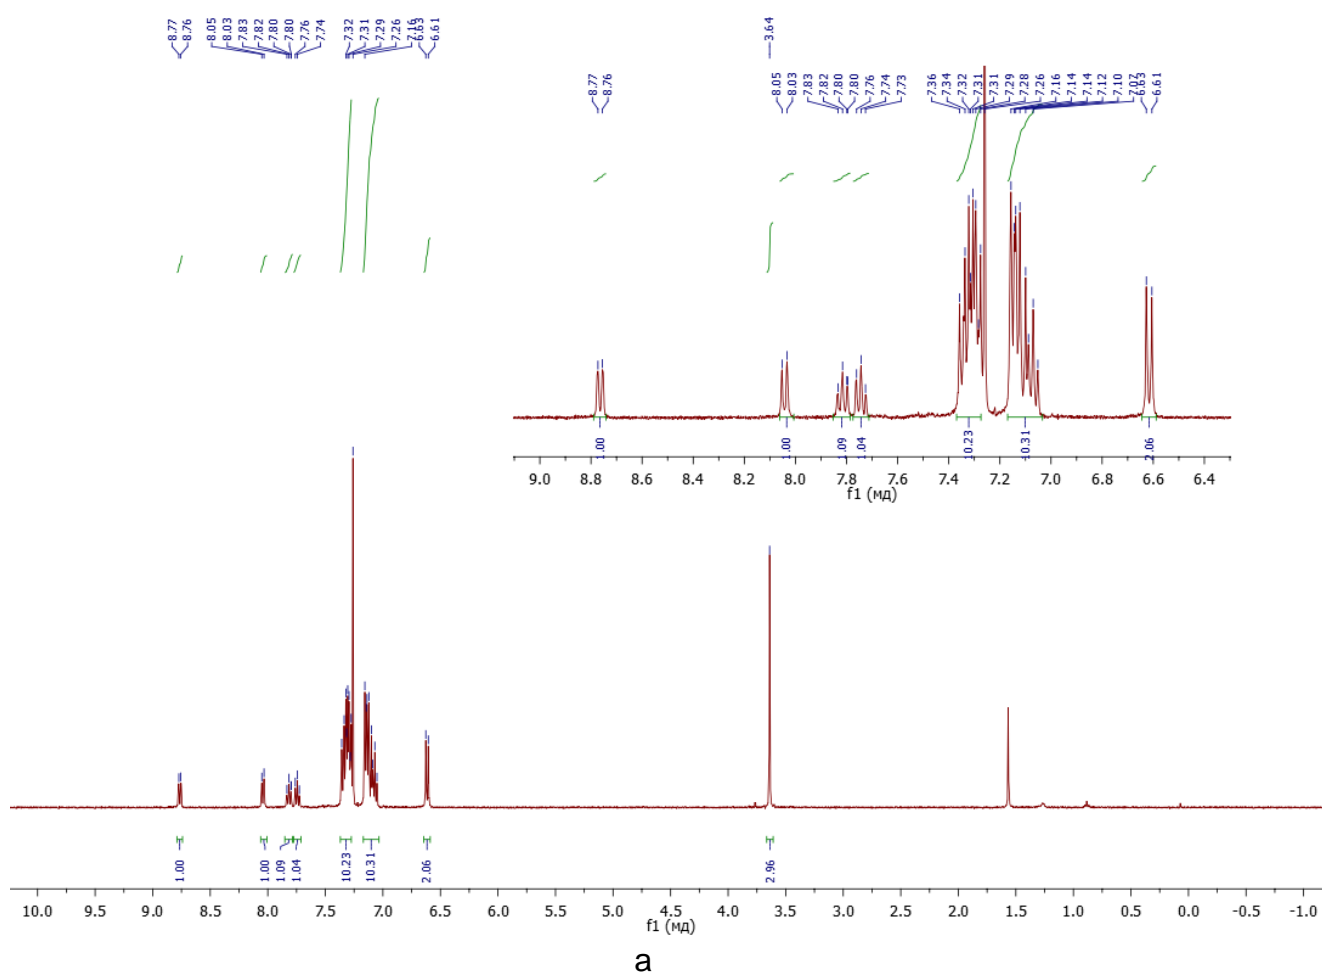

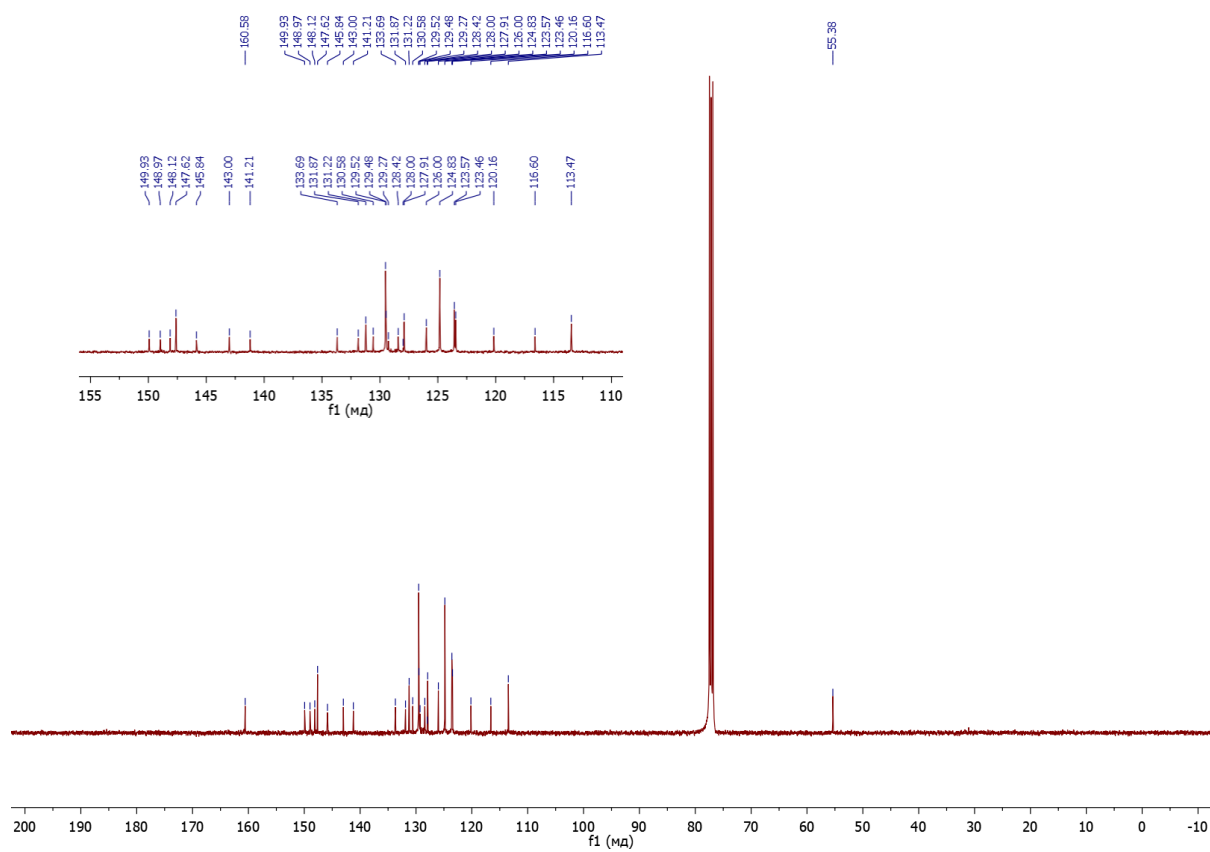

b

Line#:1 R.Time:3.365(Scan#:1307)

MassPeaks:108

RawMode:Single 3.365(1307) BasePeak:595(432697)

Фон.реж.:2.105(803) Group 1 - Event 1

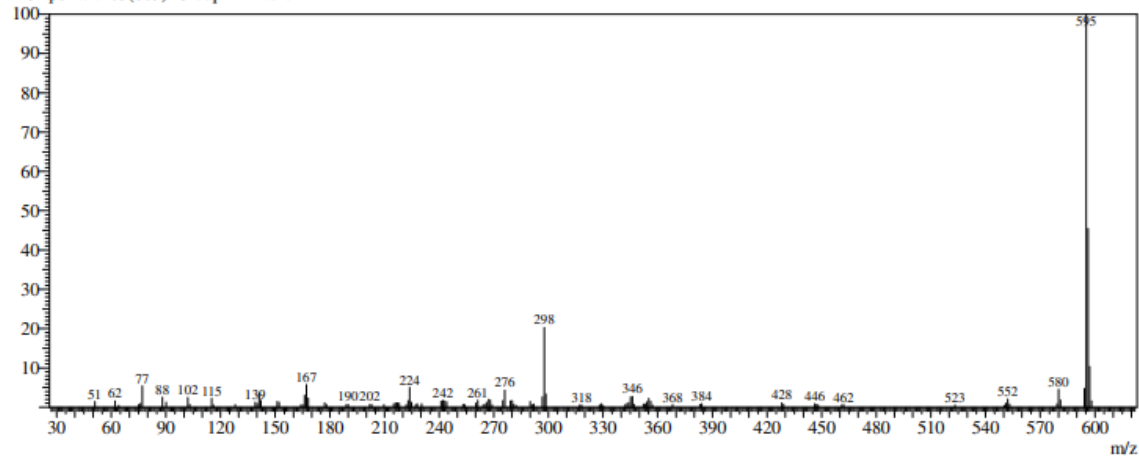

c

**Figure S5.**  $^1\text{H}$  NMR spectrum (a) and  $^{13}\text{C}$  NMR spectrum in  $\text{CDCl}_3$  (b); mass spectrum (c) of **2e**.

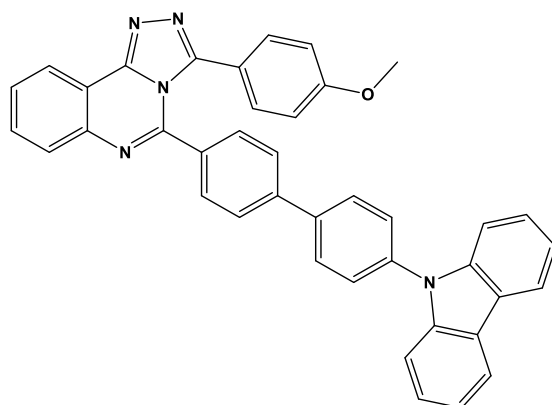

**2f**

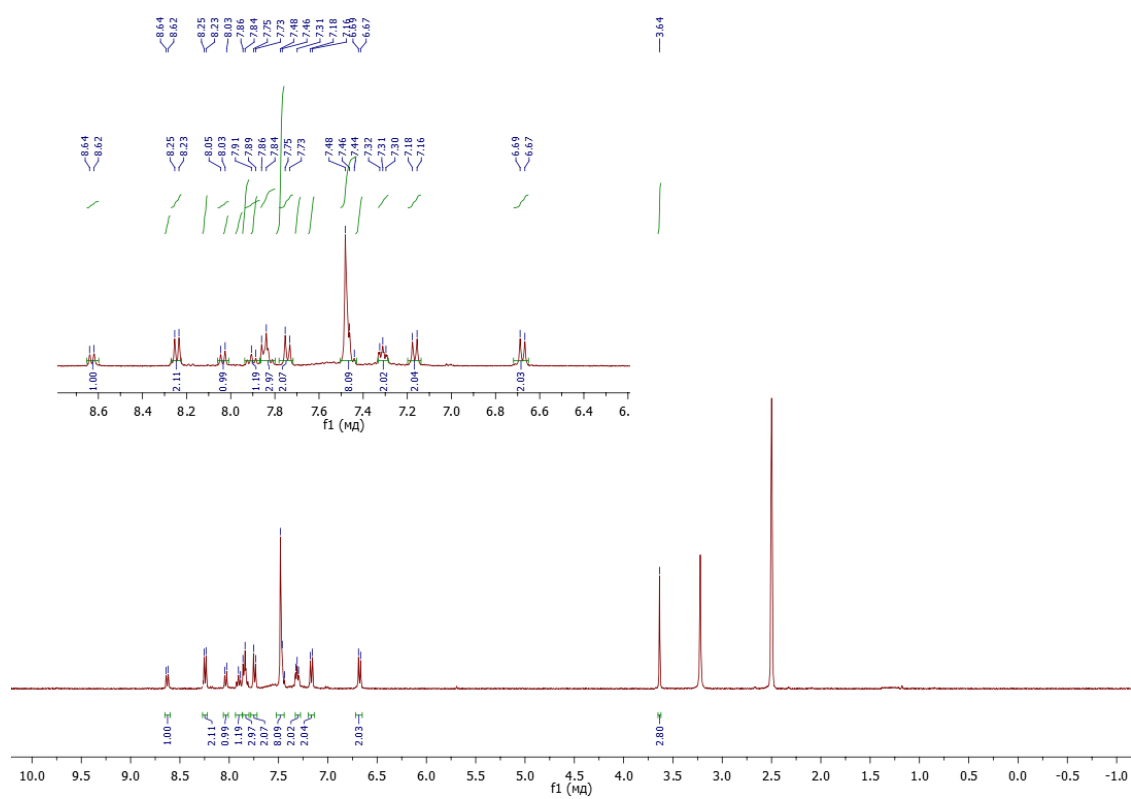

**a**

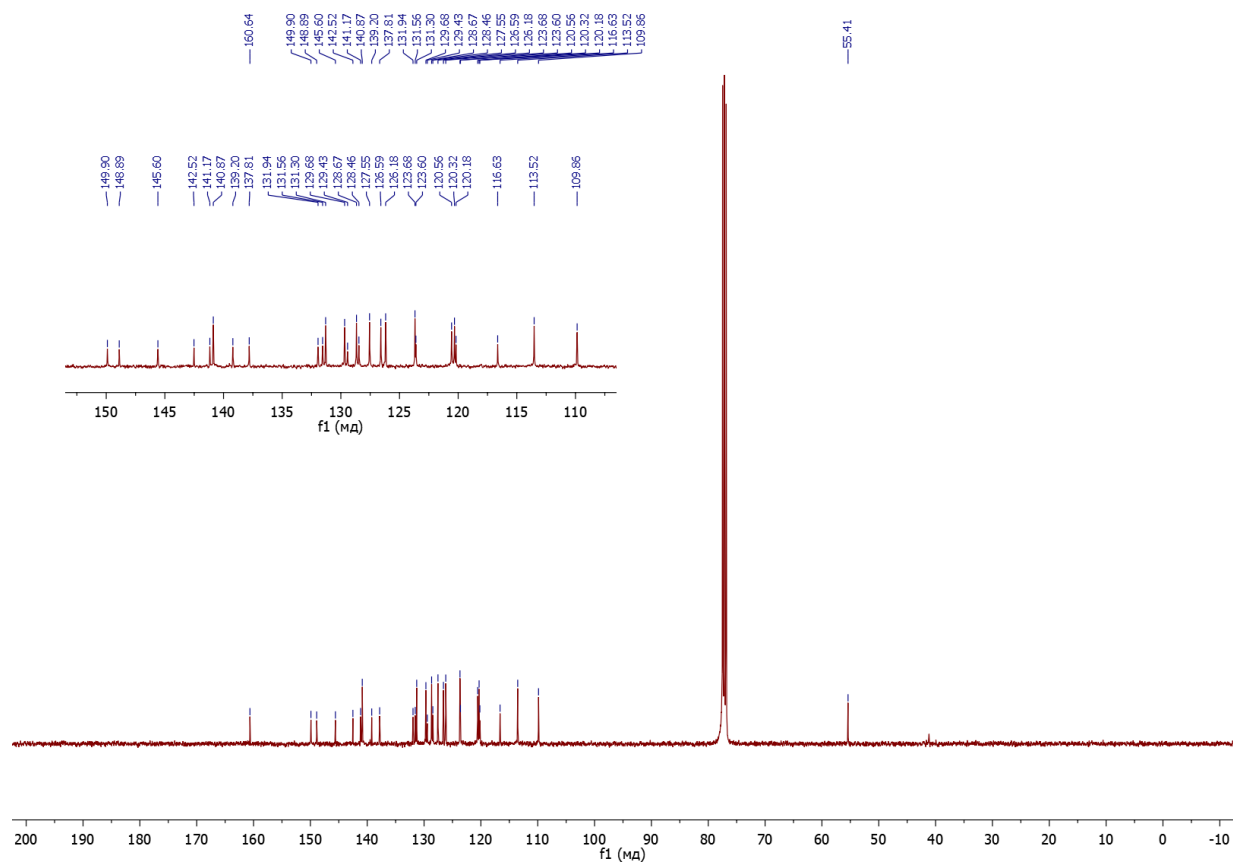

b

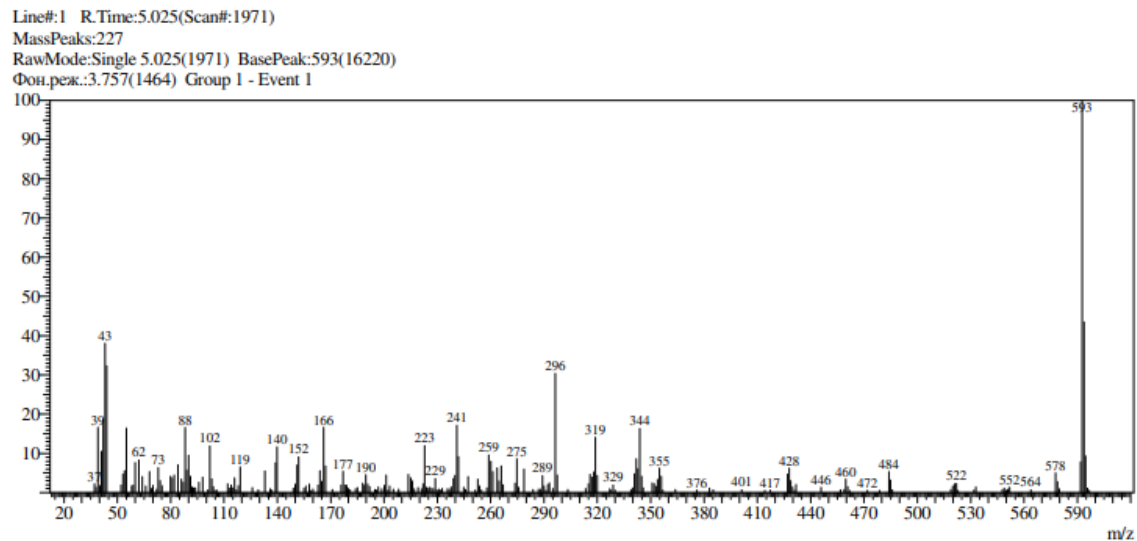

c

**Figure S6.**  $^1\text{H}$  NMR spectrum in  $\text{DMSO}-d_6$  (a) and  $^{13}\text{C}$  NMR spectrum in  $\text{CDCl}_3$  (b); mass spectrum (c) of **2f**.

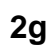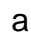

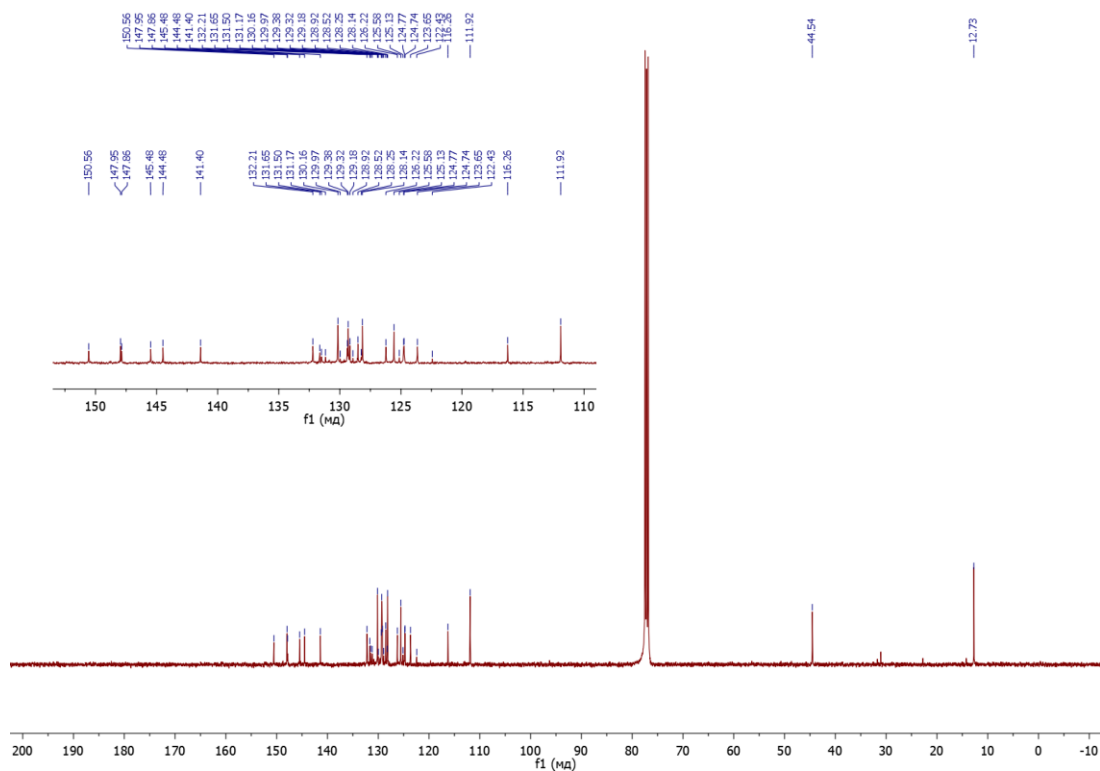

b

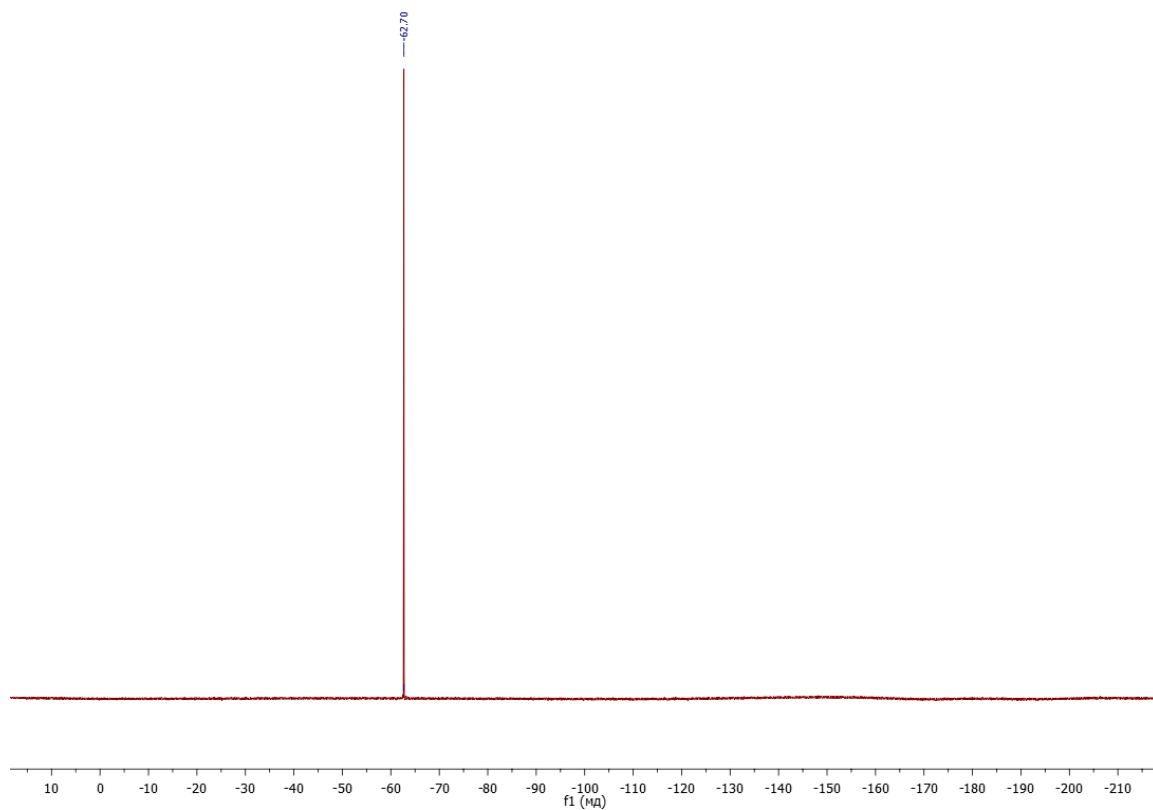

c

Line#:2 R.Time:4.570(Scan#:1789)  
 MassPeaks:273  
 RawMode:Single 4.570(1789) BasePeak:522(1409709)  
 Фон.реж.:None Group 1 - Event 1

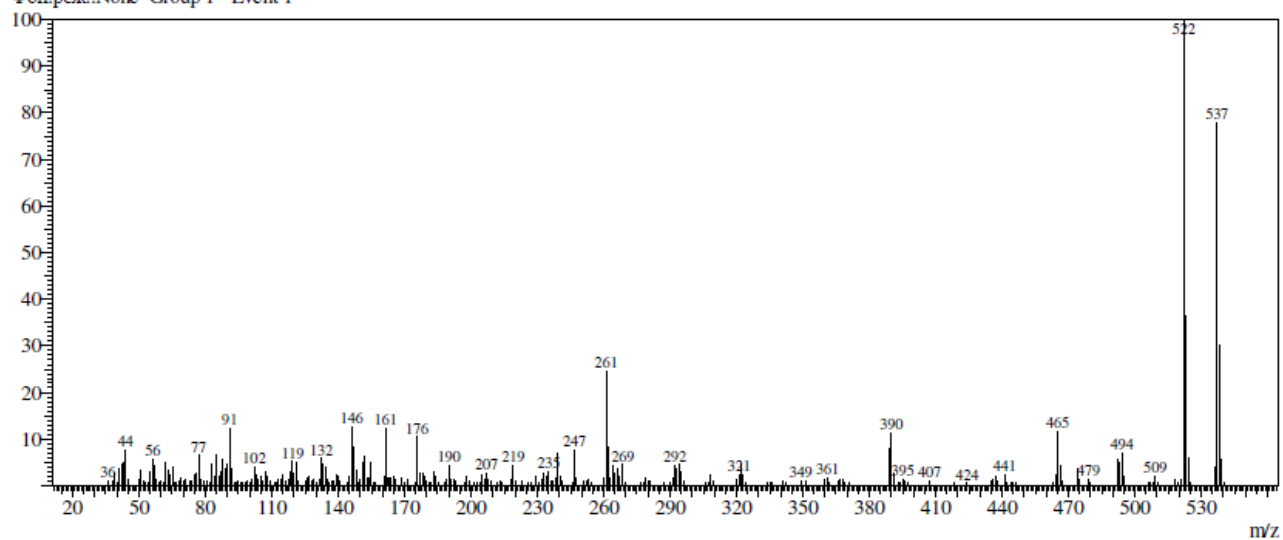

d

**Figure S7.**  $^1\text{H}$  NMR spectrum (a),  $^{13}\text{C}$  NMR spectrum (b),  $^{19}\text{F}$  NMR spectrum in  $\text{CDCl}_3$  (c) and mass spectrum (d) of **2g**.

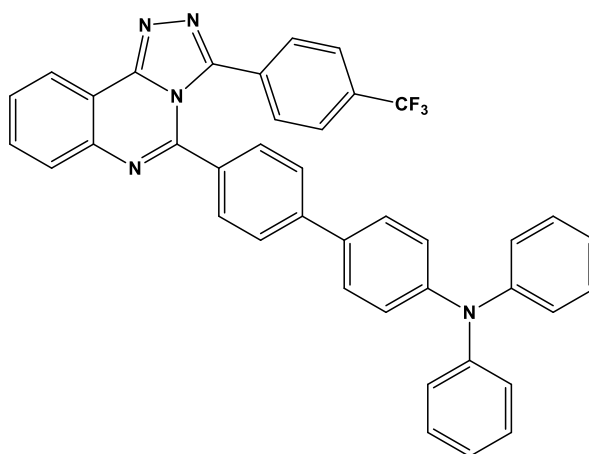

**2h**



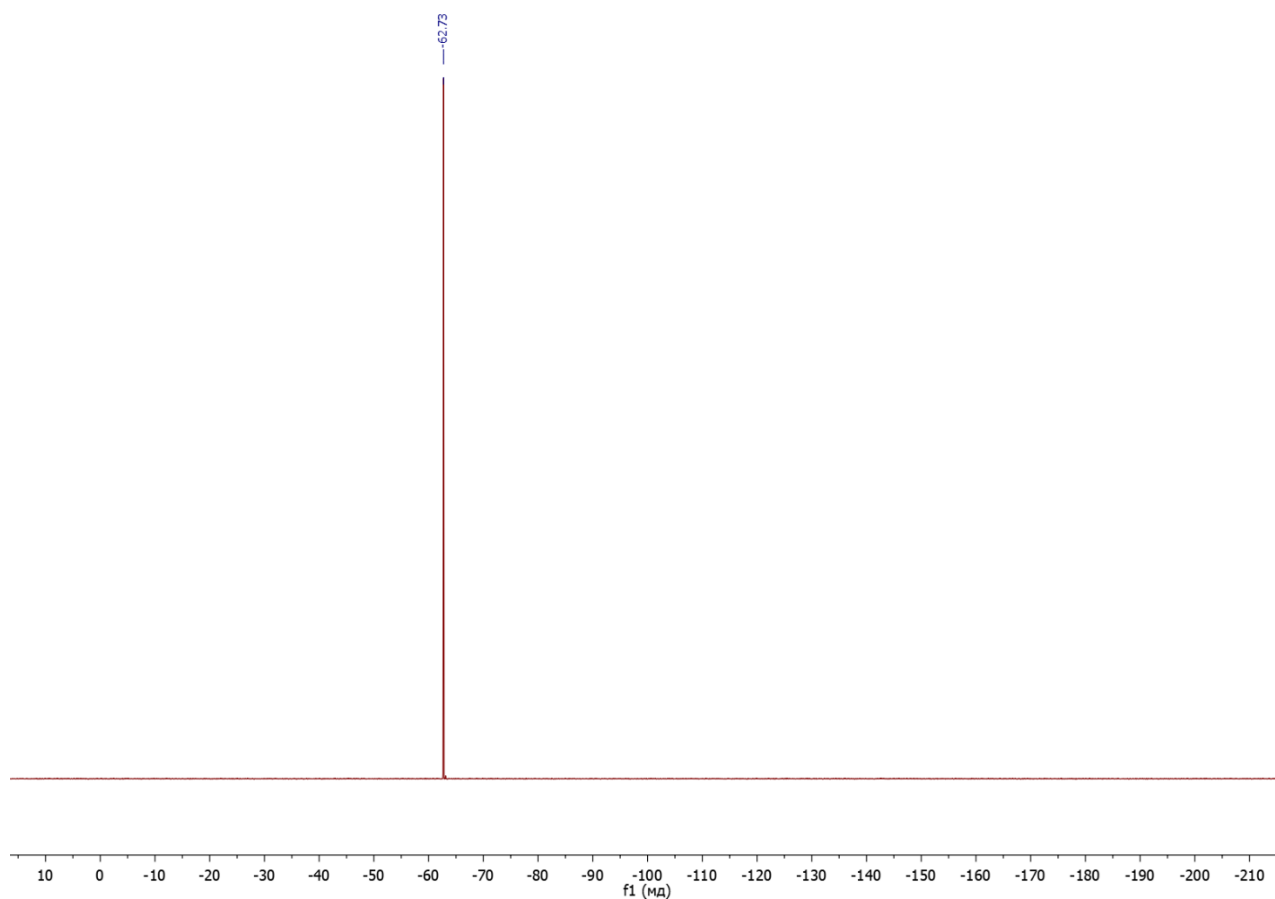

C

Line#:1 R.Time:5.370(Scan#:2109)

MassPeaks:229

RawMode:Single 5.370(2109) BasePeak:633(765258)

Фон.пик.:None Group 1 - Event 1

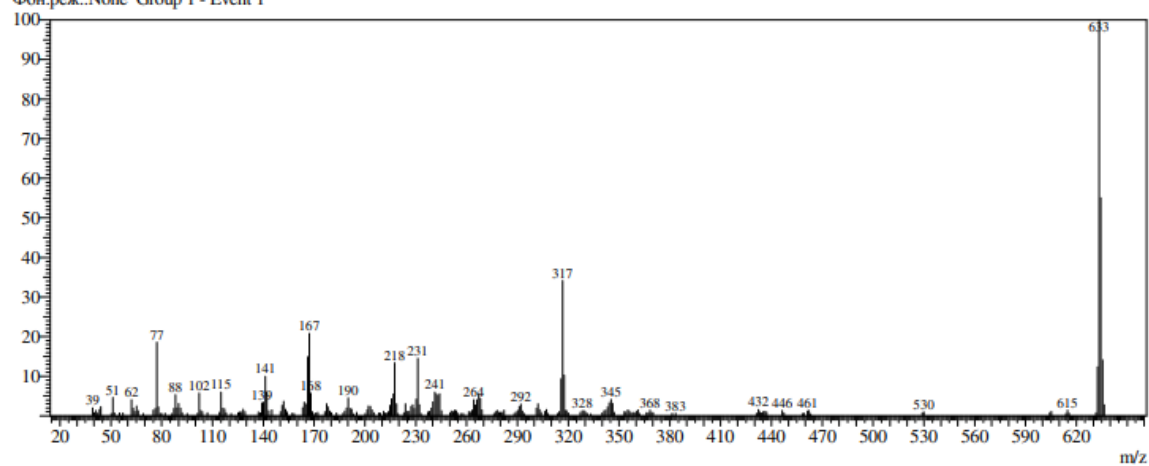

d

**Figure S8.**  $^1\text{H}$  NMR spectrum (a),  $^{13}\text{C}$  NMR spectrum (b),  $^{19}\text{F}$  NMR spectrum in  $\text{CDCl}_3$  (c) and mass spectrum (d) of **2h**.

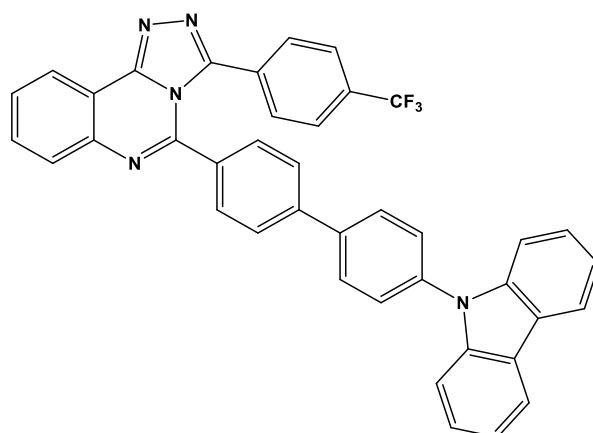

**2i**

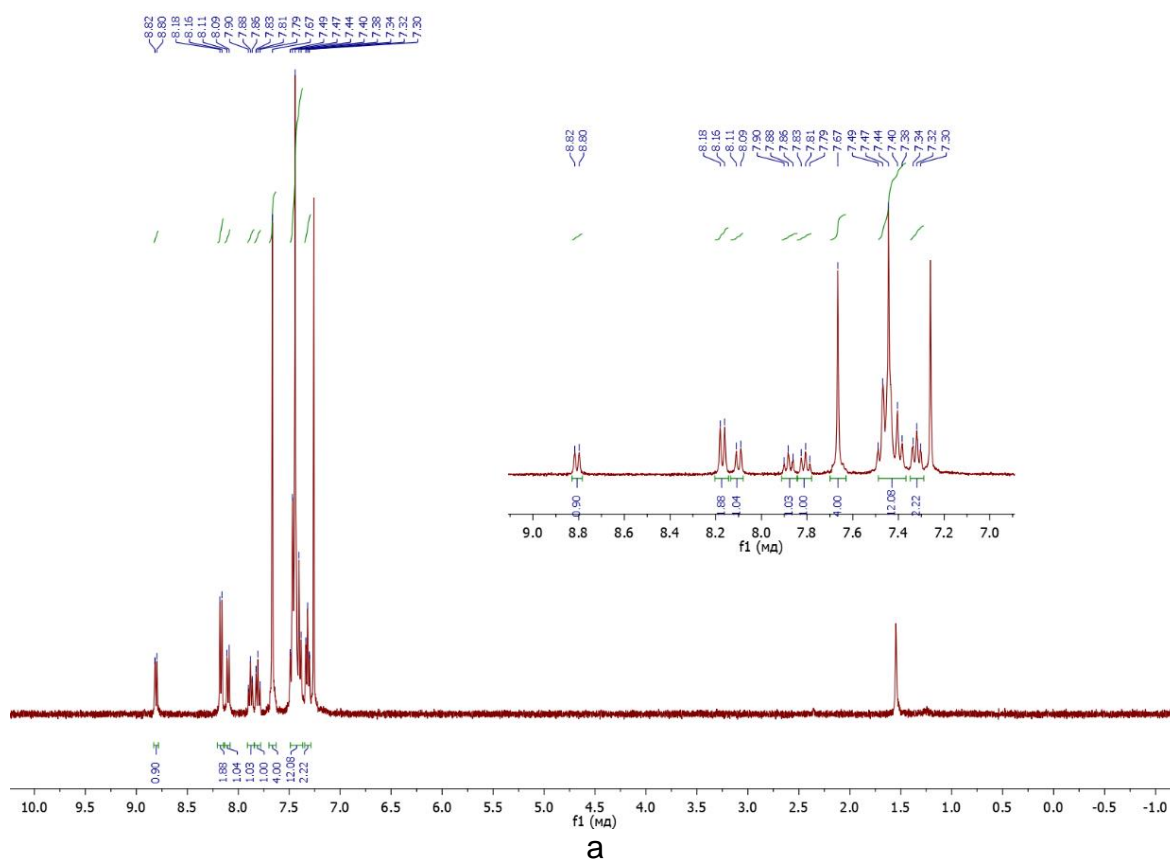

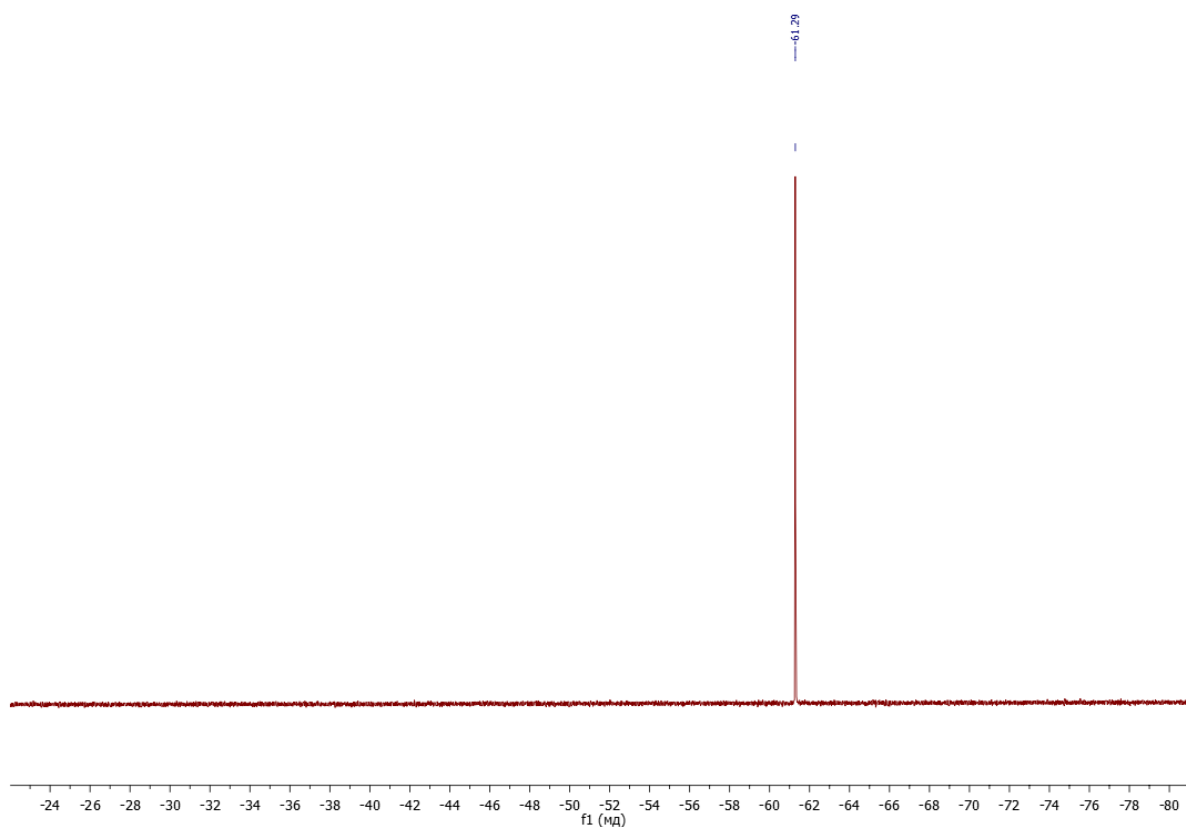

b

Line#:1 R.Time:4.993(Scan#:1958)

MassPeaks:152

RawMode:Single 4.992(1958) BasePeak:631(33482)

Фон.реж.:2.850(1101) Group 1 - Event 1

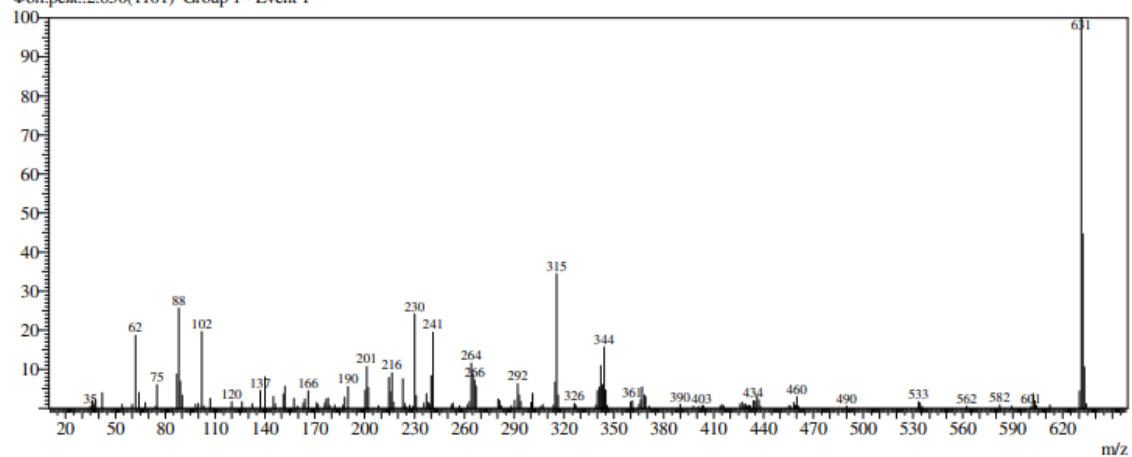

c

**Figure S9.** <sup>1</sup>H NMR spectrum in CDCl<sub>3</sub> (a), <sup>19</sup>F NMR spectrum in CDCl<sub>3</sub> (b); mass spectrum (c) of **2i**.

## 2. Crystallographic data of compounds 2a and 2e

**Table S1.** Selected bond lengths of compound **2a**.

| Bond          | Bond length (Å) | Bond          | Bond length (Å) |
|---------------|-----------------|---------------|-----------------|
| N(13) – C(4)  | 1.380(4)        | C(10) – C(5)  | 1.402(5)        |
| N(13) – C(12) | 1.418(4)        | C(10) – C(9)  | 1.394(5)        |
| N(13) – C(1)  | 1.393(4)        | C(24) – C(23) | 1.381(5)        |
| N(11) – C(10) | 1.405(4)        | C(1) – C(14)  | 1.467(5)        |
| N(11) – C(12) | 1.291(4)        | C(5) – C(6)   | 1.399(5)        |
| N(2) – N(3)   | 1.398(5)        | C(29) – C(30) | 1.380(5)        |
| N(2) – C(1)   | 1.309(5)        | C(31) – C(30) | 1.404(5)        |
| N(3) – C(4)   | 1.306(4)        | C(31) – C(32) | 1.397(5)        |
| N(34) – C(31) | 1.386(5)        | C(14) – C(15) | 1.390(5)        |
| N(34) – C(35) | 1.456(5)        | C(14) – C(19) | 1.389(5)        |
| N(34) – C(37) | 1.461(6)        | C(15) – C(16) | 1.378(5)        |
| N(27) – C(22) | 1.396(5)        | C(33) – C(32) | 1.375(5)        |
| N(27) – C(26) | 1.380(5)        | C(6) – C(7)   | 1.366(5)        |
| C(22) – C(12) | 1.468(5)        | C(9) – C(8)   | 1.372(5)        |
| C(22) – C(23) | 1.395(5)        | C(16) – C(17) | 1.388(6)        |
| C(25) – C(28) | 1.481(5)        | C(7) – C(8)   | 1.396(6)        |
| C(25) – C(24) | 1.388(5)        | C(19) – C(18) | 1.382(6)        |
| C(25) – C(26) | 1.403(5)        | C(17) – C(18) | 1.375(6)        |
| C(4) – C(5)   | 1.433(5)        | C(17) – C(20) | 1.511(6)        |
| C(28) – C(29) | 1.382(5)        | C(35) – C(36) | 1.493(7)        |
| C(28) – C(33) | 1.391(5)        | C(37) – C(38) | 1.485(7)        |

**Table S2.** Selected bond angles of compound **2a**.

| Angle                 | (°)      | Angle                 | (°)      |
|-----------------------|----------|-----------------------|----------|
| C(4) – N(13) – C(12)  | 120.9(3) | N(6) – C(1) – N(13)   | 109.1(3) |
| C(4) – N(13) – C(1)   | 104.3(3) | N(2) – C(1) – C(14)   | 122.9(3) |
| C(1) – N(13) – C(12)  | 134.6(3) | C(10) – C(5) – C(4)   | 116.2(3) |
| C(12) – N(11) – C(10) | 120.3(3) | C(6) – C(5) – C(4)    | 123.8(3) |
| C(1) – N(2) – N(3)    | 108.9(3) | C(6) – C(5) – C(10)   | 120.0(3) |
| C(4) – N(3) – N(2)    | 106.3(3) | C(27) – C(26) – C(25) | 121.4(3) |

|                       |          |                       |          |
|-----------------------|----------|-----------------------|----------|
| C(31) – N(34) – C(35) | 122.1(3) | C(24) – C(23) – C(22) | 120.4(3) |
| C(31) – N(34) – C(37) | 120.8(3) | C(30) – C(29) – C(28) | 122.1(3) |
| C(35) – N(34) – C(37) | 115.7(3) | N(34) – C(31) – C(30) | 122.6(3) |
| C(26) – C(27) – C(22) | 120.4(3) | N(34) – C(31) – C(32) | 121.0(3) |
| C(27) – C(22) – C(12) | 121.4(3) | C(32) – C(31) – C(30) | 116.4(3) |
| C(23) – C(22) – C(27) | 118.5(3) | C(15) – C(14) – C(1)  | 119.9(3) |
| C(23) – C(22) – C(12) | 120.1(3) | C(19) – C(14) – C(1)  | 121.2(3) |
| C(24) – C(25) – C(28) | 122.6(3) | C(19) – C(14) – C(15) | 118.9(4) |
| C(24) – C(25) – C(26) | 117.4(3) | C(29) – C(30) – C(31) | 121.1(3) |
| C(26) – C(25) – C(28) | 120.0(3) | C(16) – C(15) – C(14) | 119.8(4) |
| N(13) – C(4) – C(5)   | 118.8(3) | C(32) – C(33) – C(28) | 121.6(3) |
| N(3) – C(4) – N(13)   | 111.3(3) | C(7) – C(6) – C(5)    | 119.8(4) |
| N(3) – C(4) – C(5)    | 129.9(3) | C(8) – C(9) – C(10)   | 120.1(4) |
| C(29) – C(28) – C(25) | 121.8(3) | C(33) – C(32) – C(31) | 121.8(3) |
| C(29) – C(28) – C(33) | 117.0(3) | C(15) – C(16) – C(17) | 121.6(4) |
| C(33) – C(28) – C(25) | 121.3(3) | C(6) – C(7) – C(8)    | 120.4(4) |
| C(5) – C(10) – N(11)  | 122.2(3) | C(18) – C(19) – C(14) | 120.3(4) |
| C(9) – C(10) – N(11)  | 118.3(3) | C(9) – C(8) – C(7)    | 120.5(4) |
| C(9) – C(10) – C(5)   | 119.2(3) | C(16) – C(17) – C(20) | 121.1(4) |
| N(13) – C(12) – C(22) | 120.2(3) | C(18) – C(17) – C(16) | 118.0(4) |
| N(11) – C(12) – N(13) | 120.3(3) | C(18) – C(17) – C(20) | 120.9(4) |
| N(11) – C(12) – C(22) | 119.4(3) | C(17) – C(18) – C(19) | 121.3(4) |
| C(23) – C(24) – C(25) | 121.8(3) | N(34) – C(35) – C(36) | 114.7(4) |
| N(13) – C(1) – C(14)  | 127.7(3) | N(34) – C(37) – C(38) | 113.6(5) |

**Table S3.** Selected bond lengths of compound **2e**.

| Bond          | Bond length (Å) | Bond          | Bond length (Å) |
|---------------|-----------------|---------------|-----------------|
| N(13) – C(1)  | 1.401(6)        | C(28) – C(33) | 1.398(7)        |
| N(13) – C(12) | 1.412(6)        | C(28) – C(29) | 1.385(7)        |
| N(13) – C(4)  | 1.388(6)        | C(15) – C(16) | 1.379(7)        |
| O(20) – C(17) | 1.374(6)        | C(17) – C(18) | 1.367(8)        |
| O(20) – C(21) | 1.412(9)        | C(17) – C(16) | 1.376(8)        |
| N(2) – N(3)   | 1.409(6)        | C(39) – C(40) | 1.387(8)        |

|               |          |                |           |
|---------------|----------|----------------|-----------|
| N(2) – C(1)   | 1.306(6) | C(39) – C(44)  | 1.380(7)  |
| N(11) – C(10) | 1.392(7) | C(33) – C(32)  | 1.373(7)  |
| N(11) – C(12) | 1.292(6) | C(5) – C(6)    | 1.403(7)  |
| N(34) – C(31) | 1.409(6) | C(40) – C(41)  | 1.382(8)  |
| N(34) – C(39) | 1.423(6) | C(19) – C(18)  | 1.378(7)  |
| N(34) – C(35) | 1.442(7) | C(24) – C(23)  | 1.376(7)  |
| N(3) – C(4)   | 1.300(7) | C(7) – C(6)    | 1.374(8)  |
| C(14) – C(1)  | 1.477(7) | C(7) – C(8)    | 1.390(9)  |
| C(14) – C(15) | 1.365(8) | C(44) – C(43)  | 1.384(8)  |
| C(14) – C(19) | 1.380(7) | C(30) – C(29)  | 1.385(7)  |
| C(10) – C(5)  | 1.400(7) | C(43) – C(42)  | 1.371(9)  |
| C(10) – C(9)  | 1.400(8) | C(42) – C(41)  | 1.382(8)  |
| C(12) – C(22) | 1.475(7) | C(8) – C(9)    | 1.378(8)  |
| C(4) – C(5)   | 1.436(7) | C(35) – C(36)  | 1.380(9)  |
| C(26) – C(25) | 1.394(7) | C(35) – C(38)  | 1.375(9)  |
| C(26) – C(27) | 1.383(6) | C(36) – C(37)  | 1.386(12) |
| C(25) – C(28) | 1.472(7) | C(21) – H(21A) | 0.9600    |
| C(25) – C(24) | 1.387(7) | C(21) – H(21B) | 0.9600    |
| C(22) – C(27) | 1.388(7) | C(21) – H(21C) | 0.9600    |
| C(22) – C(23) | 1.380(8) | C(37) – C(2)   | 1.351(16) |
| C(31) – C(32) | 1.400(8) | C(38) – C(3)   | 1.402(12) |
| C(31) – C(30) | 1.389(7) | C(2) – C(3)    | 1.372(17) |

**Table S4.** Selected bond angles of compound **2e**.

| Angle                 | (°)      | Angle                 | (°)      |
|-----------------------|----------|-----------------------|----------|
| C(1) – N(13) – C(12)  | 135.0(4) | O(20) – C(17) – C(16) | 115.5(5) |
| C(4) – N(13) – C(1)   | 104.3(4) | C(18) – C(17) – O(20) | 124.6(5) |
| C(4) – N(13) – C(12)  | 120.6(4) | C(18) – C(17) – C(16) | 119.9(5) |
| C(17) – O(20) – C(21) | 117.6(5) | C(40) – C(39) – N(34) | 120.6(5) |
| C(1) – N(2) – N(3)    | 109.3(4) | C(44) – C(39) – N(34) | 120.2(5) |
| C(12) – N(11) – C(10) | 120.2(4) | C(44) – C(39) – C(40) | 119.2(5) |
| C(31) – N(34) – C(39) | 121.7(4) | C(32) – C(33) – C(28) | 121.9(5) |
| C(31) – N(34) – C(35) | 117.2(4) | C(10) – C(5) – C(4)   | 116.2(4) |

|                       |          |                         |           |
|-----------------------|----------|-------------------------|-----------|
| C(39) – N(34) – C(35) | 119.6(4) | C(10) – C(5) – C(6)     | 120.9(5)  |
| C(4) – N(3) – N(2)    | 106.1(4) | C(6) – C(5) – C(4)      | 122.8(5)  |
| C(15) – C(14) – C(1)  | 122.3(5) | C(41) – C(40) – C(39)   | 119.2(5)  |
| C(15) – C(14) – C(19) | 119.6(5) | C(18) – C(19) – C(14)   | 120.4(5)  |
| C(19) – C(14) – C(1)  | 118.1(5) | C(6) – C(7) – C(8)      | 120.0(5)  |
| N(11) – C(10) – C(5)  | 122.8(4) | C(17) – C(18) – C(19)   | 119.8(5)  |
| N(11) – C(10) – C(9)  | 118.1(5) | C(39) – C(44) – C(43)   | 121.0(5)  |
| C(9) – C(10) – C(5)   | 119.1(5) | C(33) – C(32) – C(31)   | 120.3(5)  |
| N(13) – C(1) – C(14)  | 128.0(4) | C(29) – C(30) – C(31)   | 120.5(5)  |
| N(2) – C(1) – N(13)   | 108.7(4) | C(24) – C(23) – C(22)   | 119.6(5)  |
| N(2) – C(1) – C(14)   | 123.3(5) | C(7) – C(6) – C(5)      | 119.1(5)  |
| N(13) – C(12) – C(22) | 118.7(4) | C(42) – C(43) – C(44)   | 120.0(5)  |
| N(11) – C(12) – N(13) | 121.2(4) | C(43) – C(42) – C(41)   | 119.1(5)  |
| N(11) – C(12) – C(22) | 120.1(4) | C(9) – C(8) – C(7)      | 121.8(6)  |
| N(13) – C(4) – C(5)   | 118.8(4) | C(17) – C(16) – C(15)   | 120.2(5)  |
| N(3) – C(4) – N(13)   | 111.5(4) | C(8) – C(9) – C(10)     | 119.1(6)  |
| N(3) – C(4) – C(5)    | 129.7(5) | C(42) – C(41) – C(40)   | 121.5(6)  |
| C(27) – C(26) – C(25) | 121.2(5) | C(42) – C(41) – H(41)   | 119.3     |
| C(26) – C(25) – C(28) | 122.6(4) | C(36) – C(35) – N(34)   | 120.8(6)  |
| C(24) – C(25) – C(26) | 117.5(4) | C(38) – C(35) – N(34)   | 118.4(6)  |
| C(24) – C(25) – C(28) | 119.9(5) | C(38) – C(35) – C(36)   | 120.8(6)  |
| C(27) – C(22) – C(12) | 119.0(5) | C(35) – C(36) – C(37)   | 119.8(9)  |
| C(23) – C(22) – C(12) | 121.1(5) | C(28) – C(29) – C(30)   | 121.6(5)  |
| C(23) – C(22) – C(27) | 119.9(4) | O(20) – C(21) – H(21A)  | 109.5     |
| C(32) – C(31) – N(34) | 120.4(5) | O(20) – C(21) – C(21B)  | 109.5     |
| C(30) – C(31) – N(34) | 121.2(5) | O(20) – C(21) – H(21C)  | 109.5     |
| C(30) – C(31) – C(32) | 118.4(5) | H(21A) – C(21) – H(21B) | 109.5     |
| C(33) – C(28) – C(25) | 121.2(5) | H(21A) – C(21) – H(21C) | 109.5     |
| C(29) – C(28) – C(25) | 121.5(5) | H(21B) – C(21) – H(21C) | 109.5     |
| C(29) – C(28) – C(33) | 117.3(4) | C(2) – C(37) – C(36)    | 120.0(10) |
| C(26) – C(27) – C(22) | 119.7(5) | C(35) – C(38) – C(3)    | 118.2(9)  |
| C(27) – C(26) – C(25) | 121.2(5) | C(37) – C(2) – C(3)     | 120.7(9)  |
| C(14) – C(15) – C(16) | 120.1(5) | C(2) – C(3) – C(38)     | 120.5(10) |

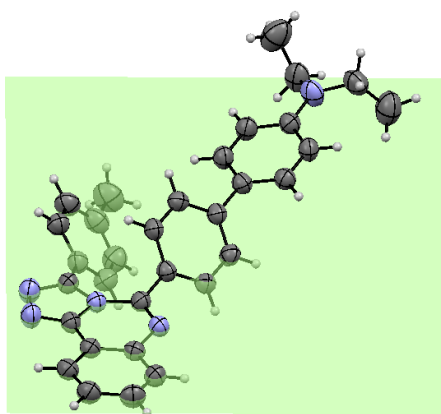

**2a**

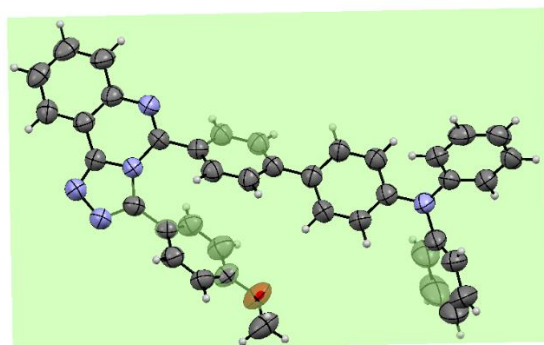

**2e**

**Figure S10.** Planarity of compounds **2a** and **2e**.

### 3. Absorption and emission spectra of fluorophores in toluene and MeCN

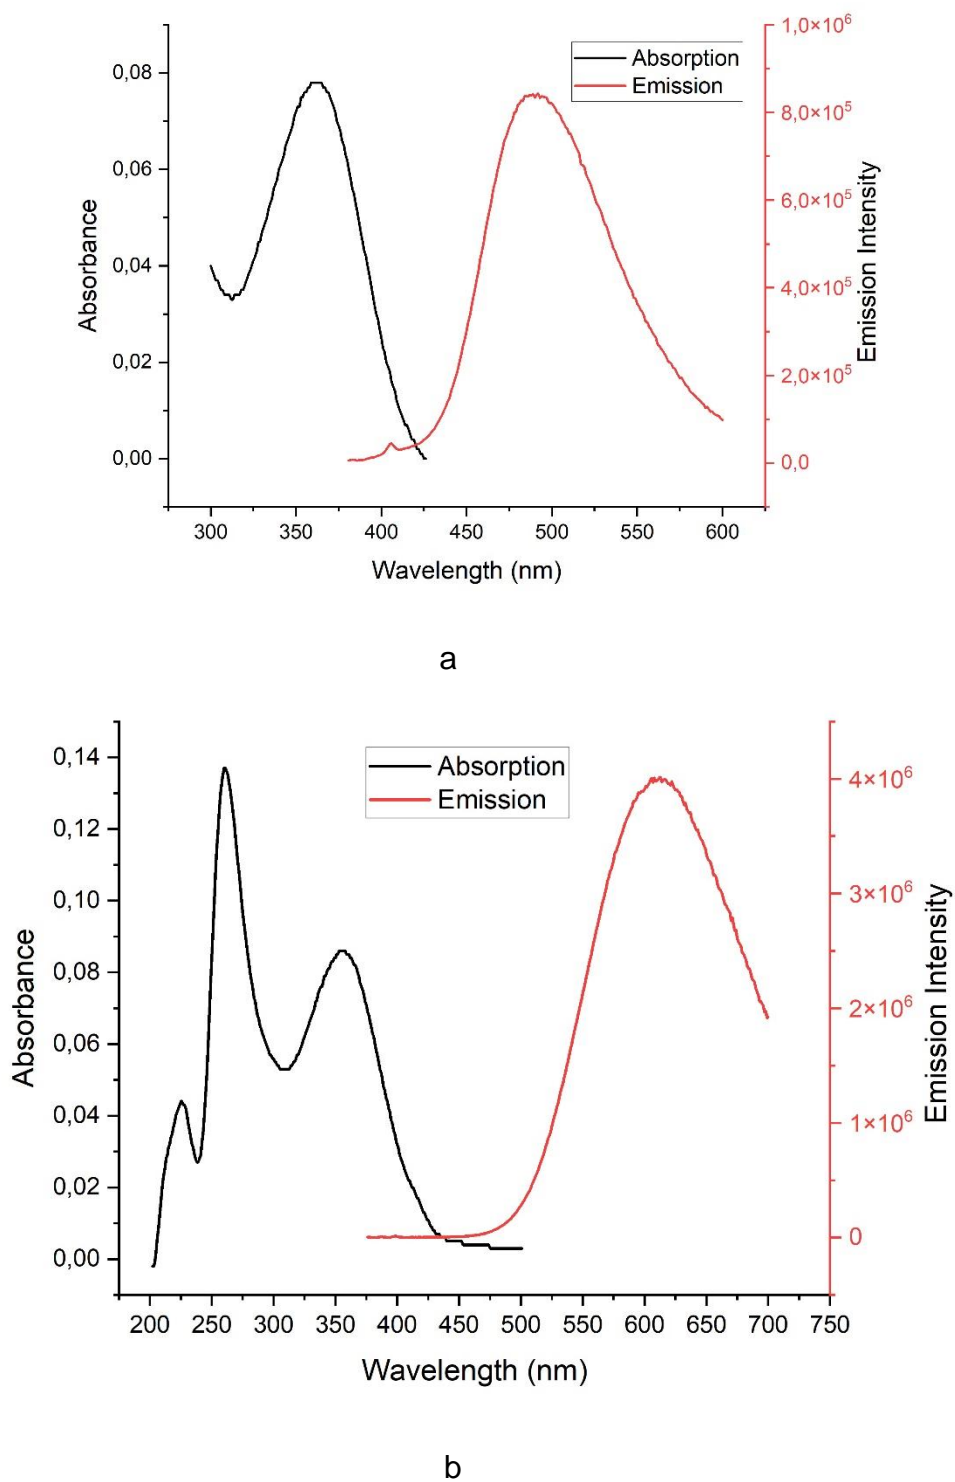

**Figure S11.** Absorption and emission spectra of compound **2a** in toluene (a) and in MeCN (b).

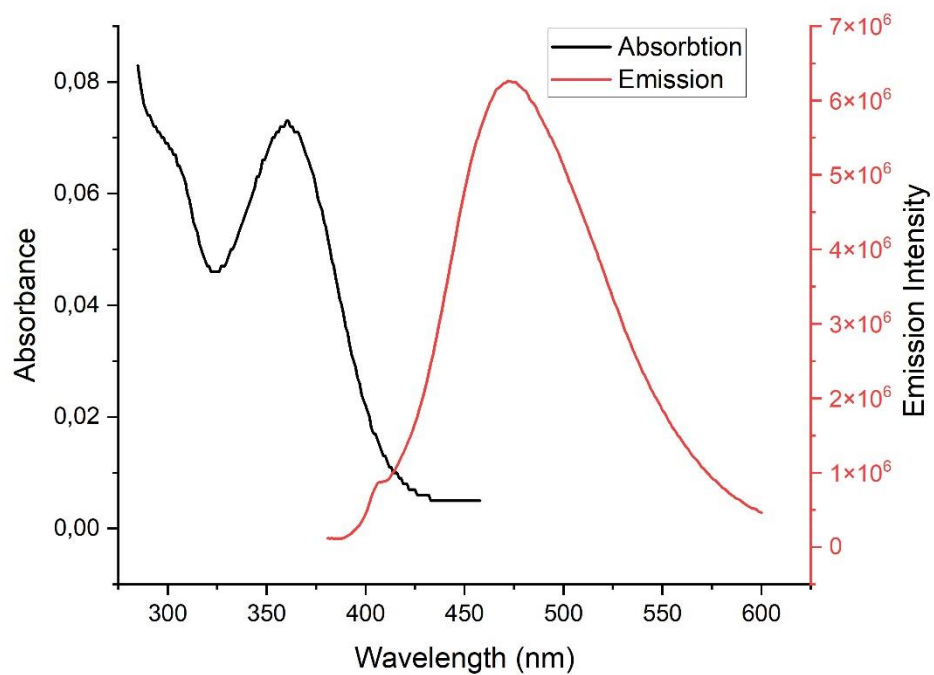

**a**

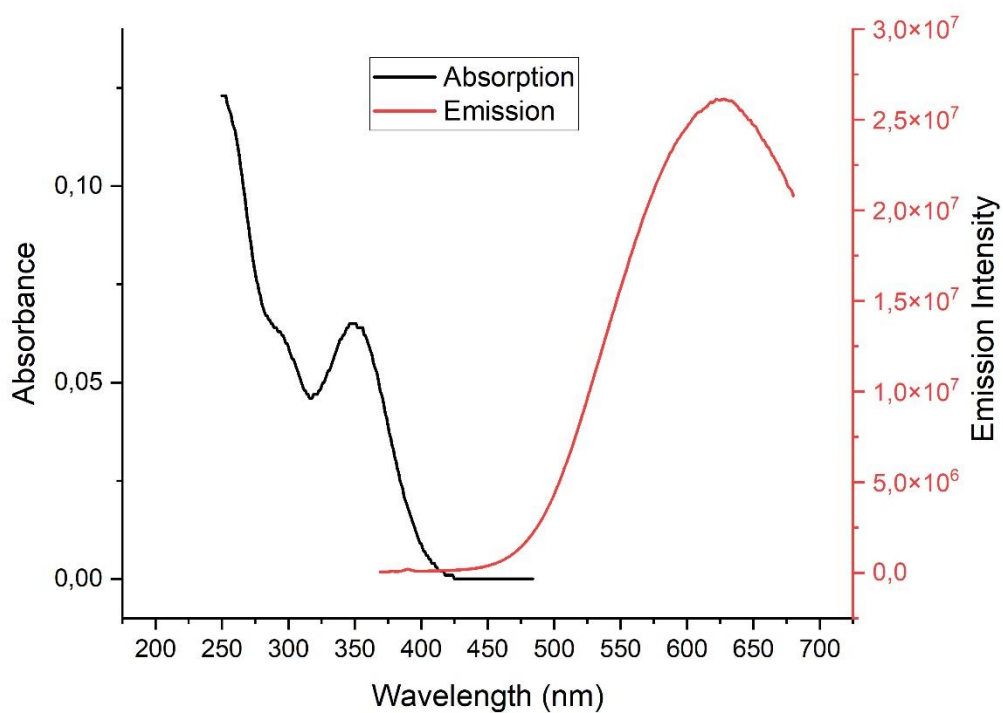

**b**

**Figure S12.** Absorption and emission spectra of compound **2b** in toluene (a) and in MeCN (b).

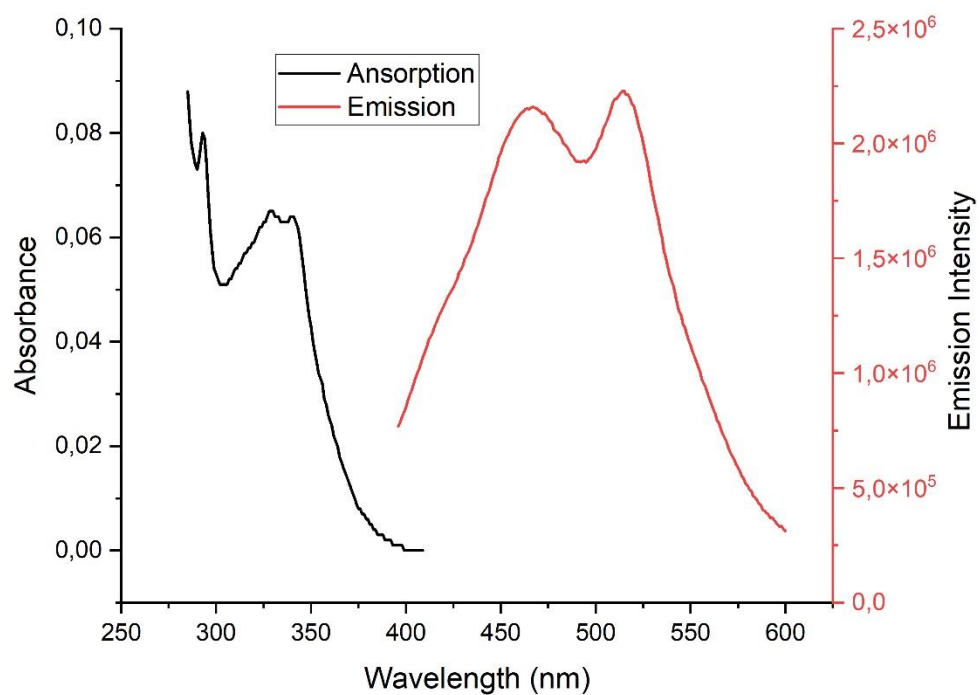

**a**

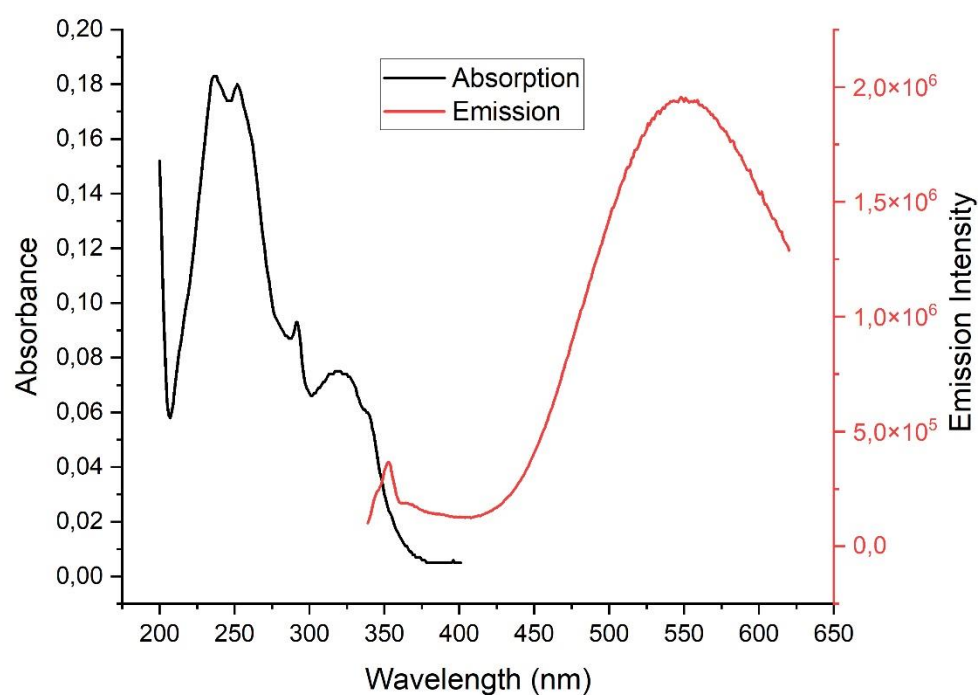

**b**

**Figure S13.** Absorption and emission spectra of compound **2c** in toluene (a) and in MeCN (b).

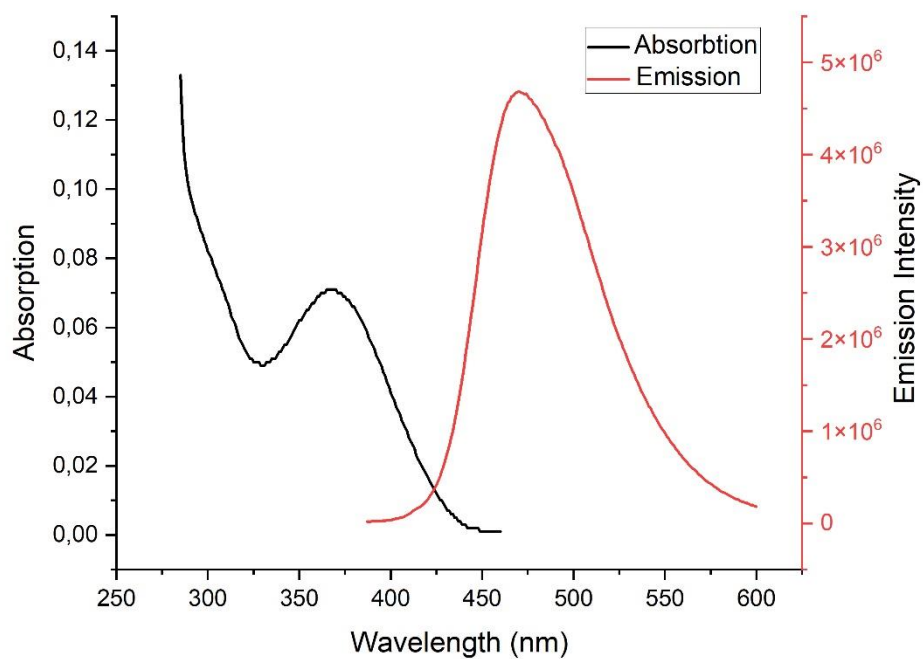

a

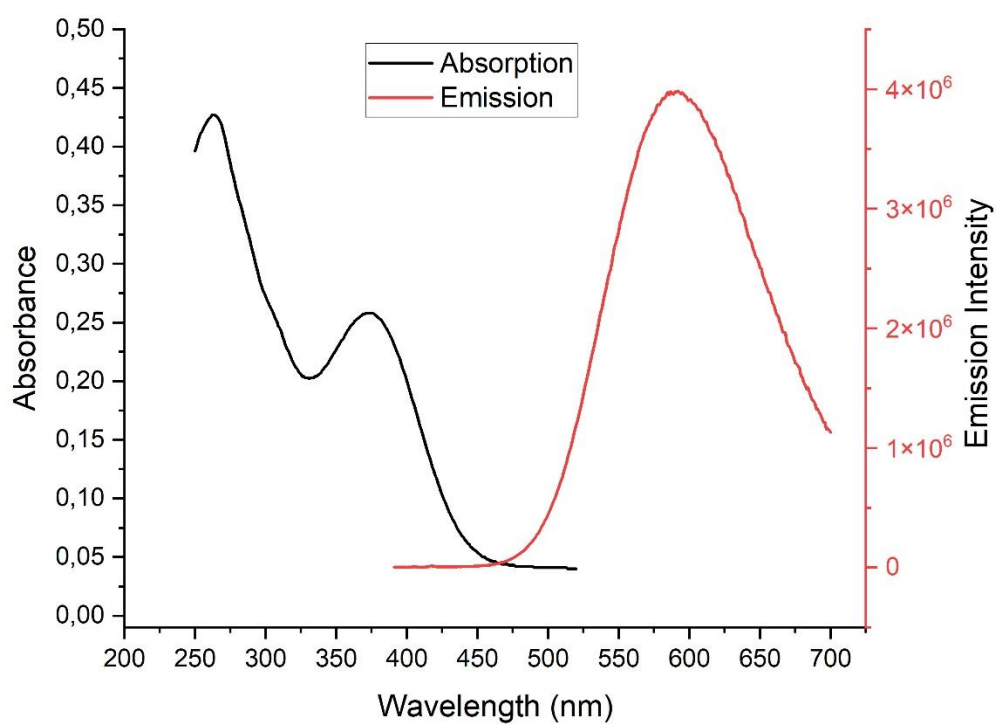

b

**Figure S14.** Absorption and emission spectra of compound **2d** in toluene (a) and in MeCN (b).

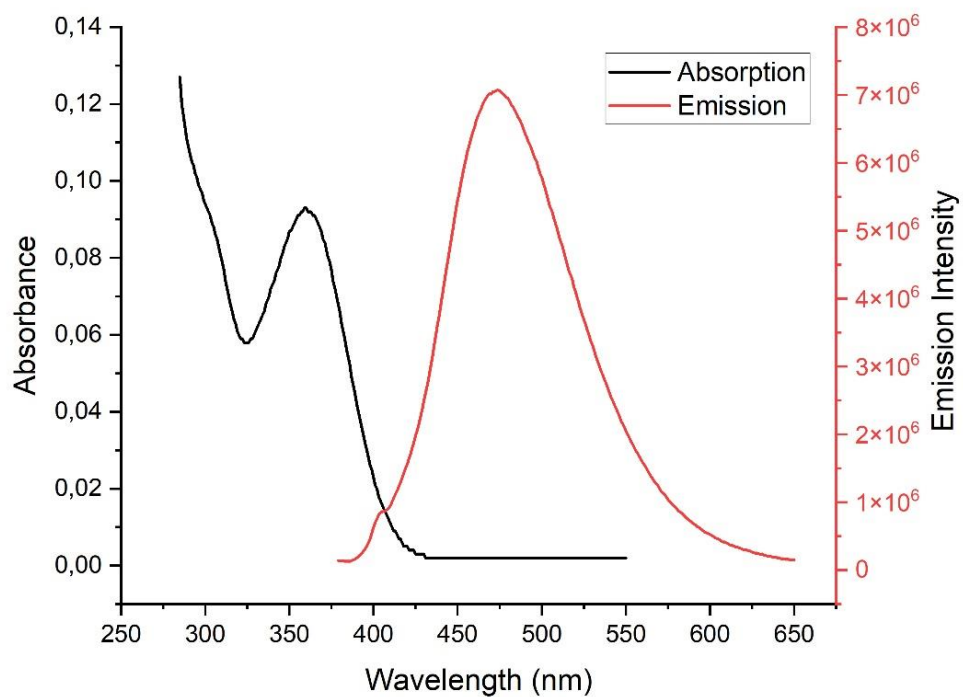

a

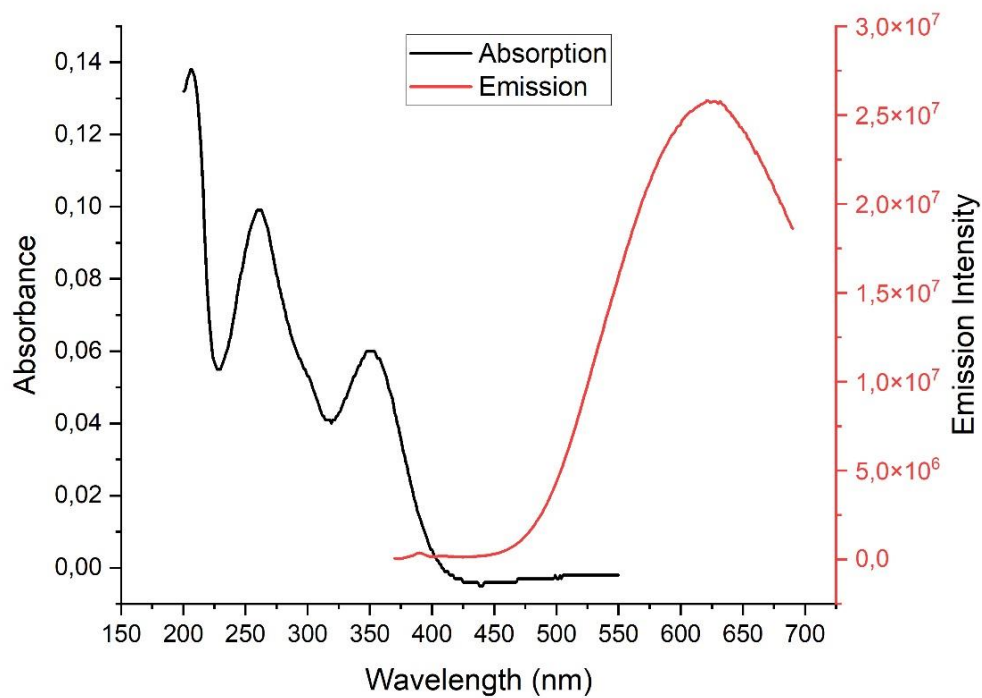

b

**Figure S15.** Absorption and emission spectra of compound **2e** in toluene (a) and in MeCN (b).

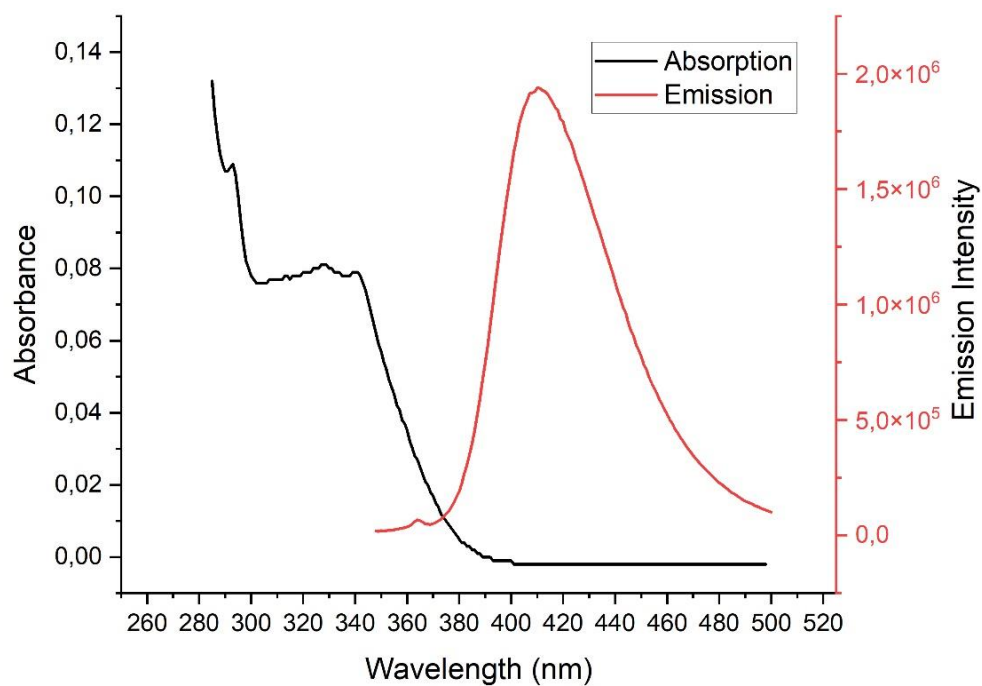

**a**

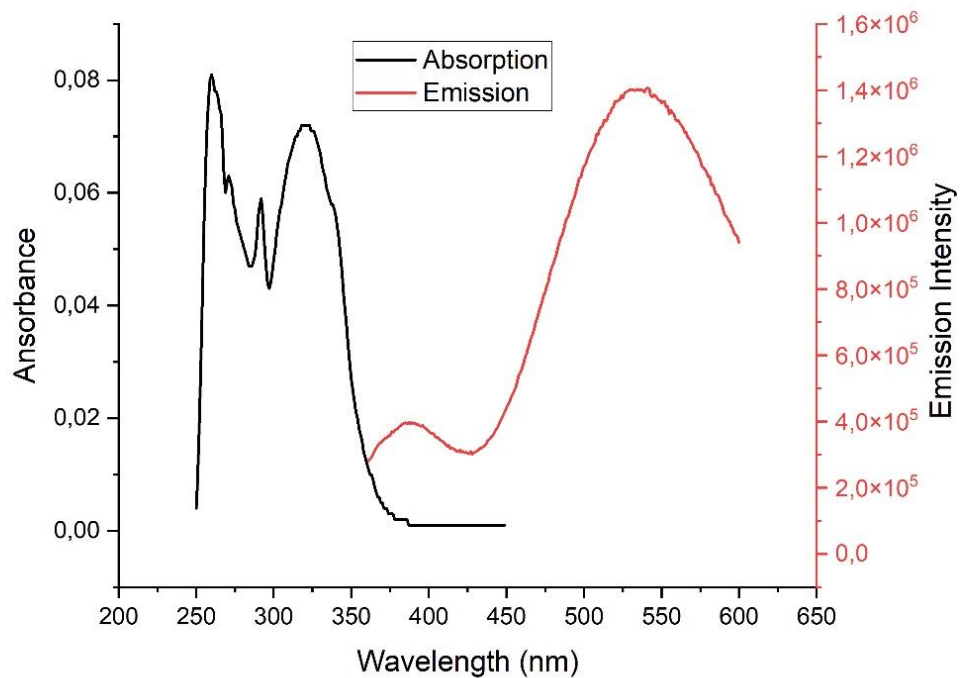

**b**

**Figure S16.** Absorption and emission spectra of compound **2f** in toluene (a) and in MeCN (b).

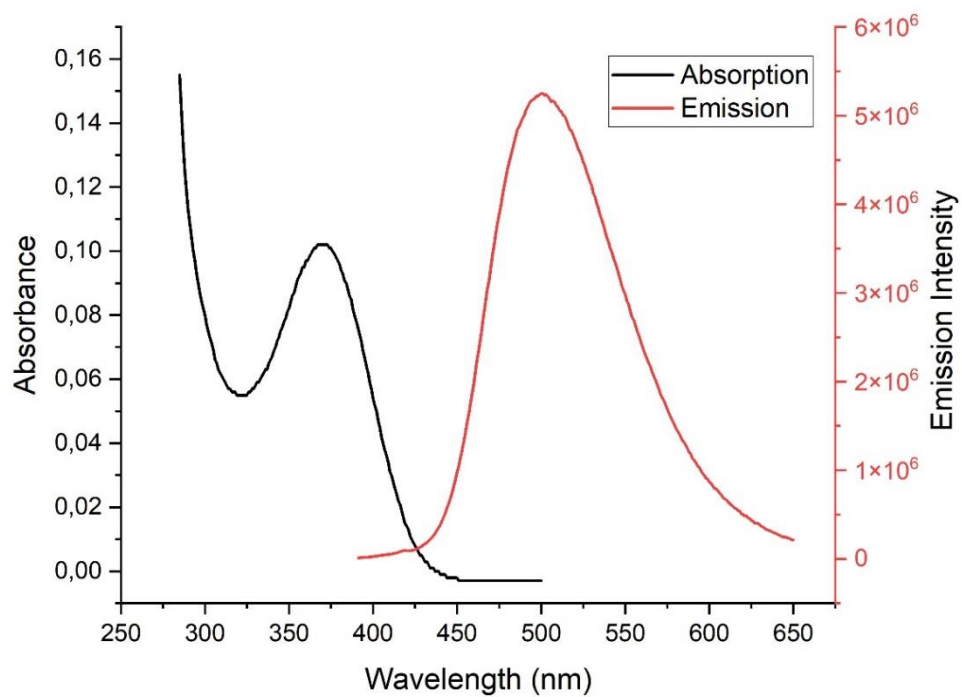

**a**

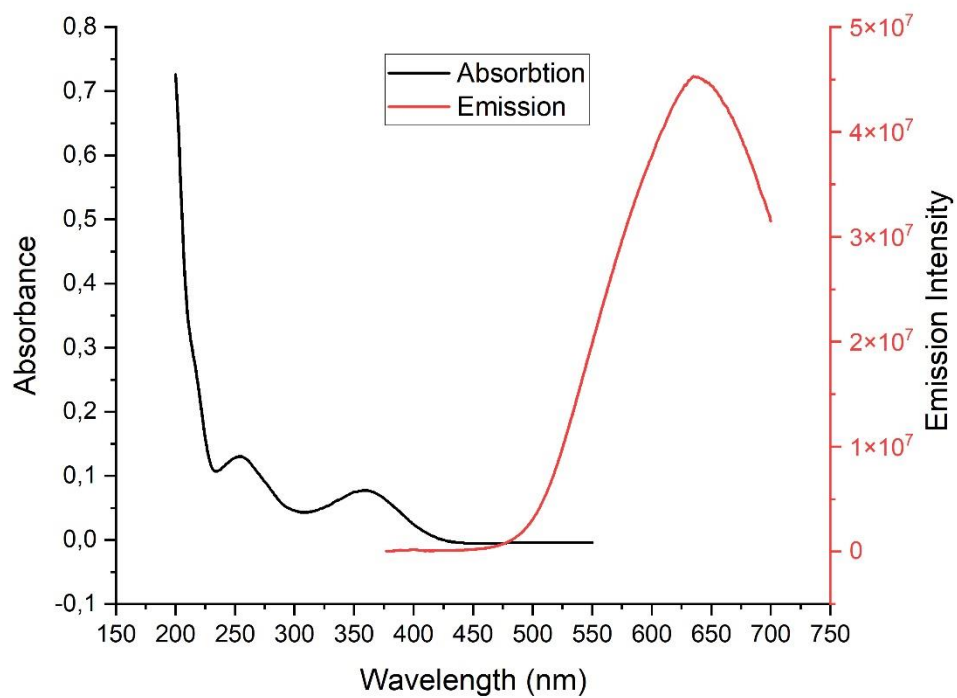

**b**

**Figure S17.** Absorption and emission spectra of compound **2g** in toluene (a) and in MeCN (b).

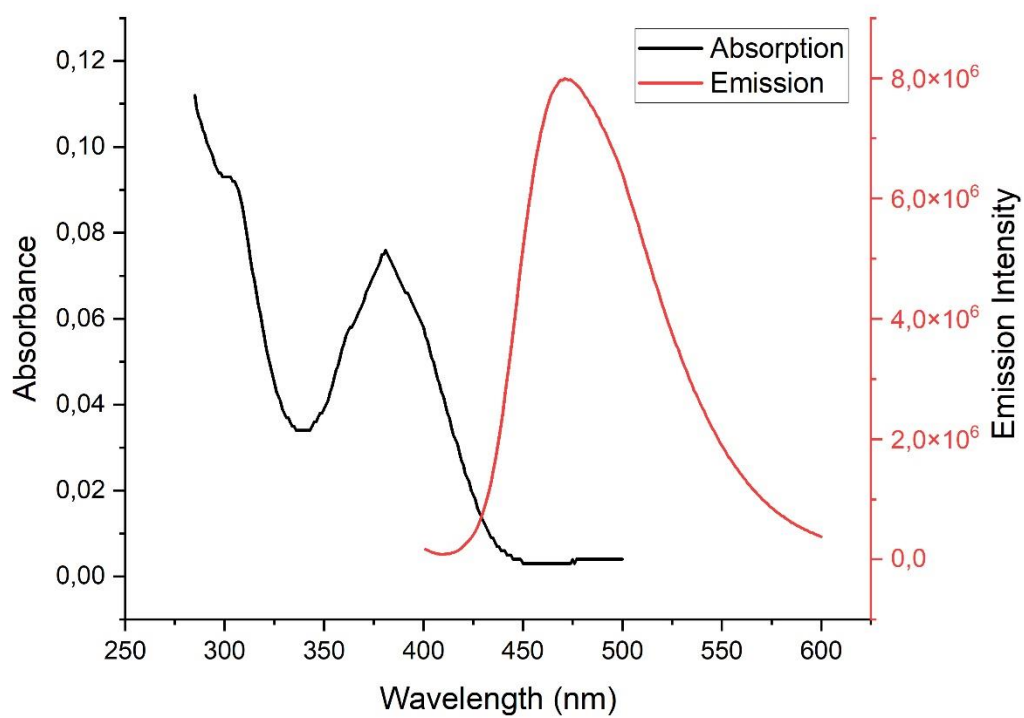

a

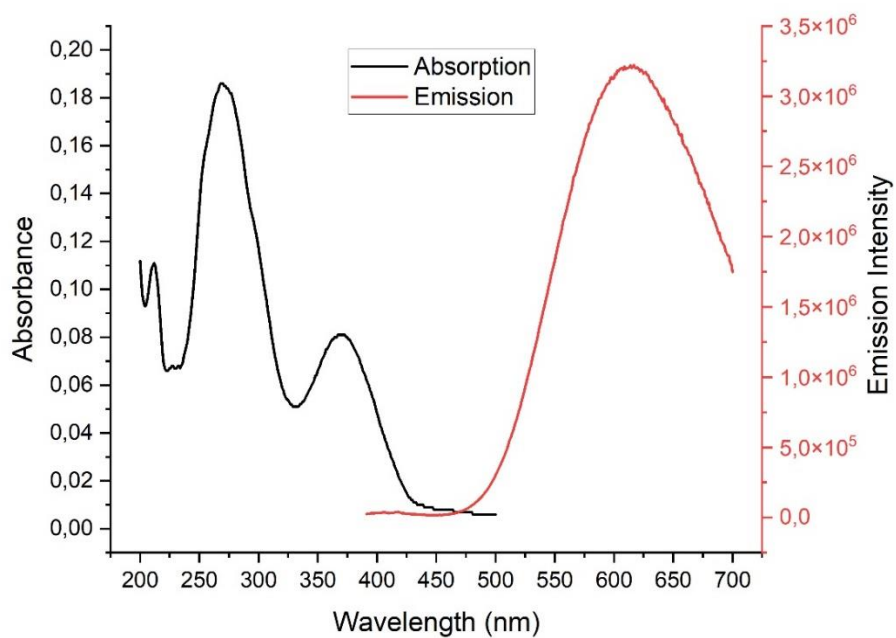

b

**Figure S18.** Absorption and emission spectra of compound **2h** in toluene (a) and in MeCN (b).

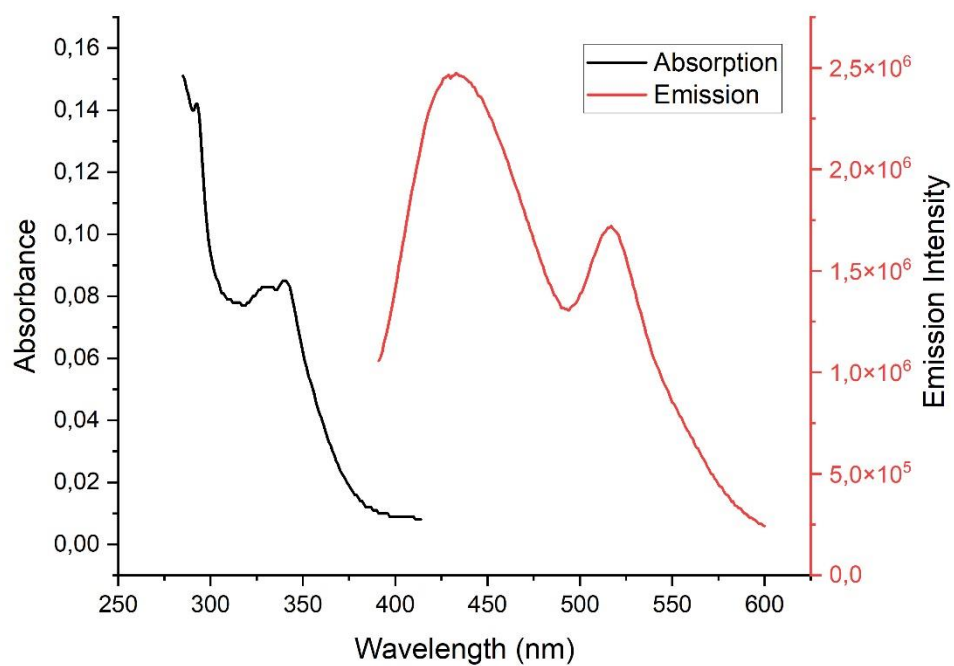

**a**

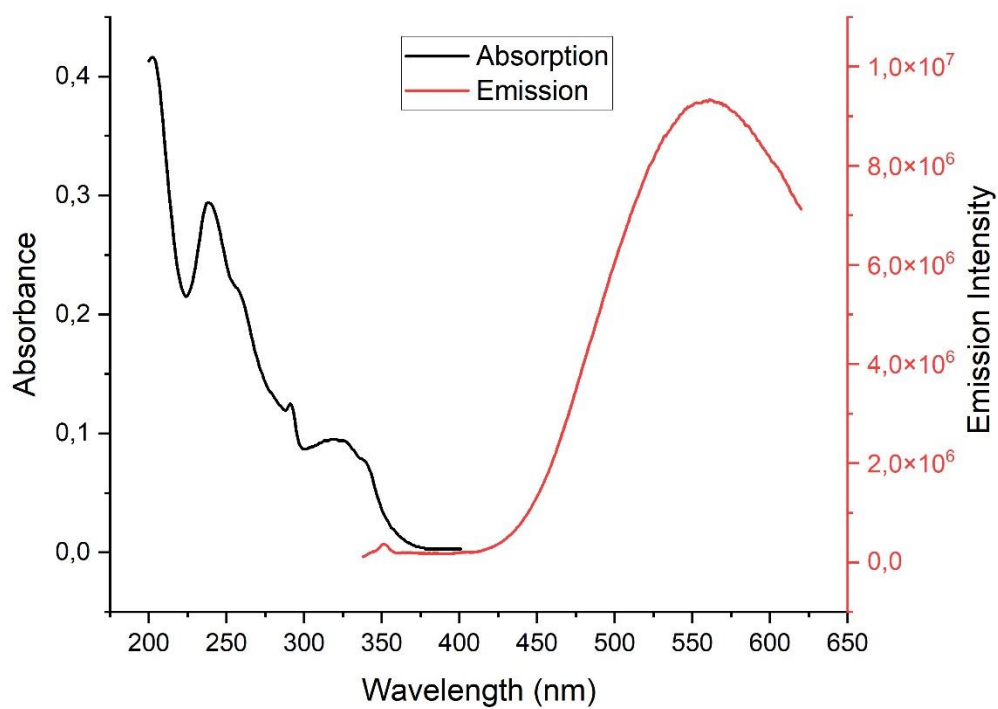

**b**

**Figure S19.** Absorption and emission spectra of compound **2i** in toluene (a) and in MeCN (b).

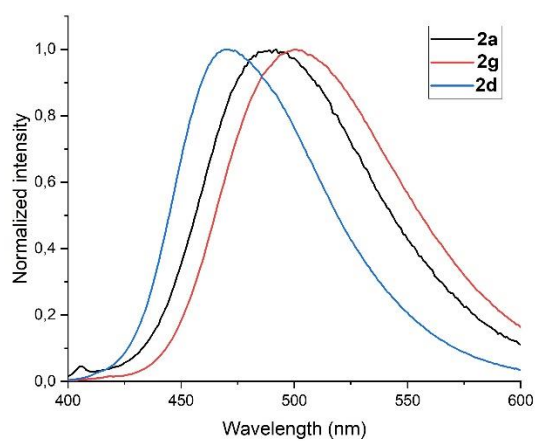

a

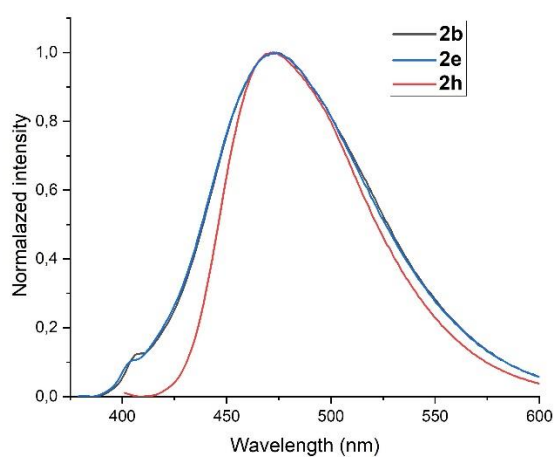

b

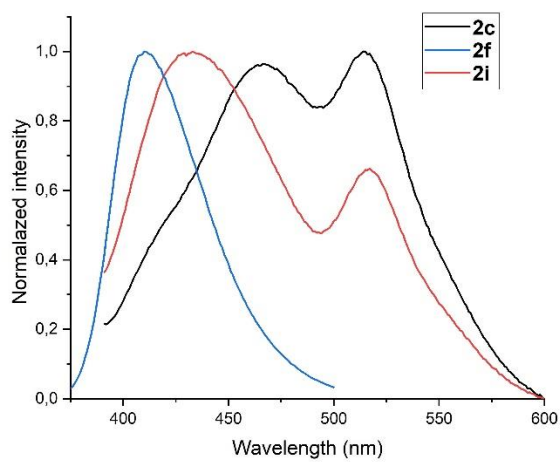

**Figure S20.** Emission spectra of compounds **2a**, **2d**, **2g** (a) **2b**, **2e**, **2h** (b) and **2c**, **2f**, **2i** (c) in toluene.

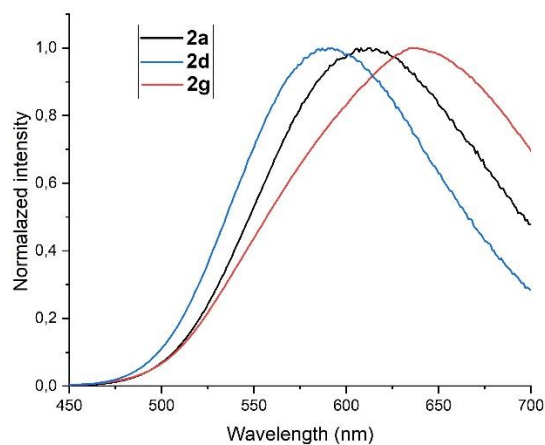

**a**

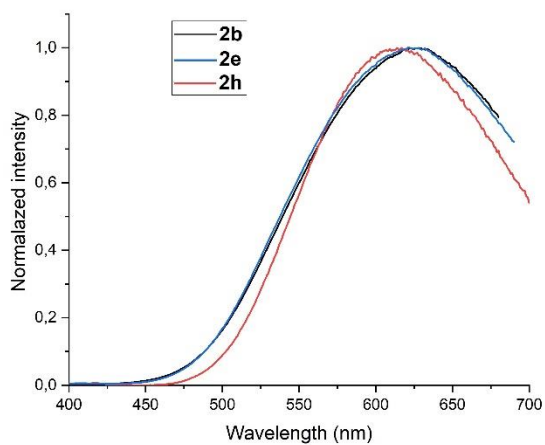

**b**

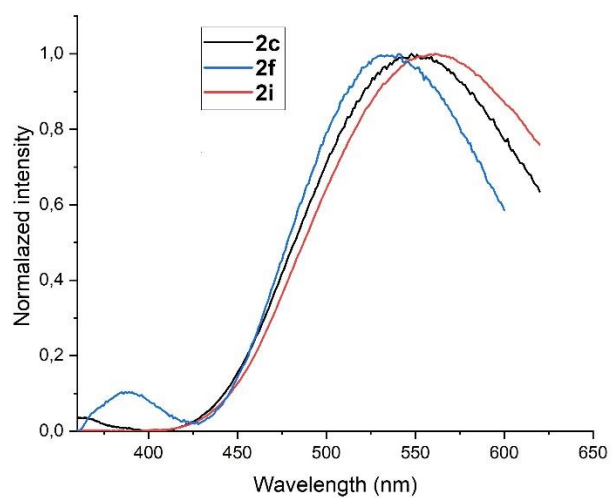

**Figure S21.** Emission spectra of compounds **2a**, **2d**, **2g** (a) **2b**, **2e**, **2h** (b) and **2c**, **2f**, **2i** (c) in MeCN.

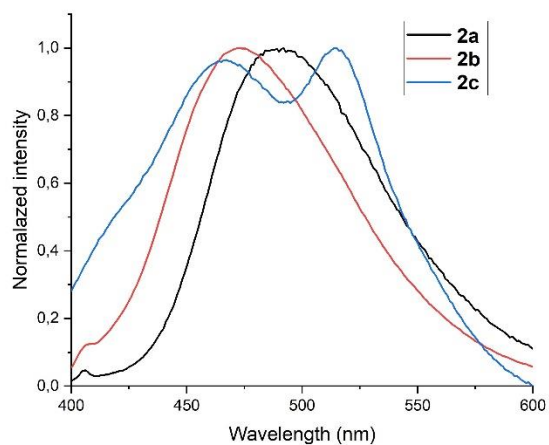

**a**

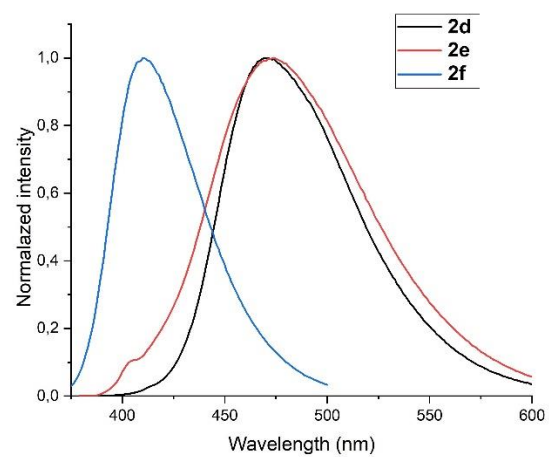

**b**

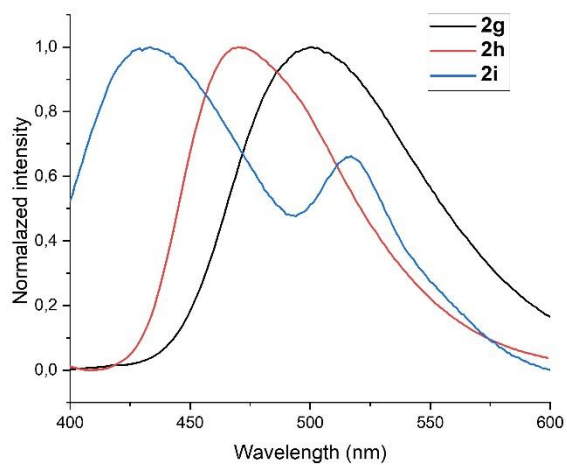

**c**

**Figure S22.** Emission spectra of compounds **2a-c** (a) **2d-f** (b) and **2g-i** (c) in toluene.

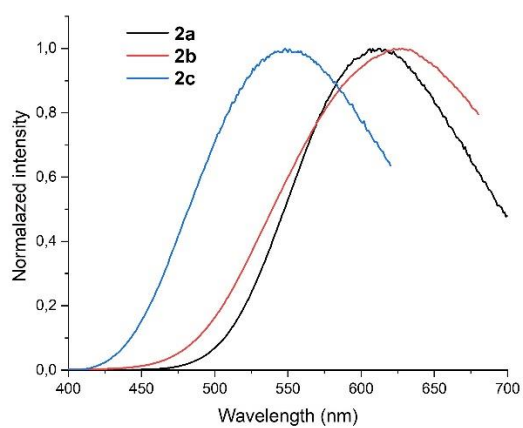

**a**

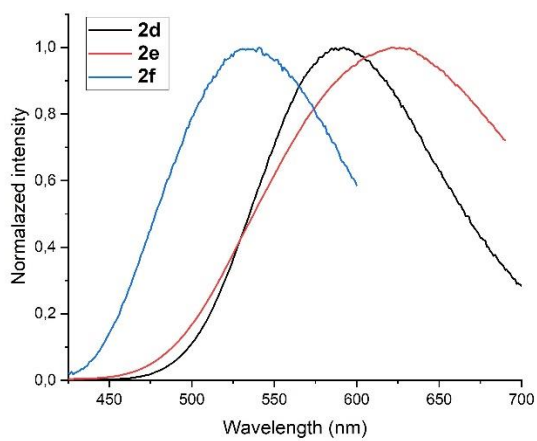

**b**

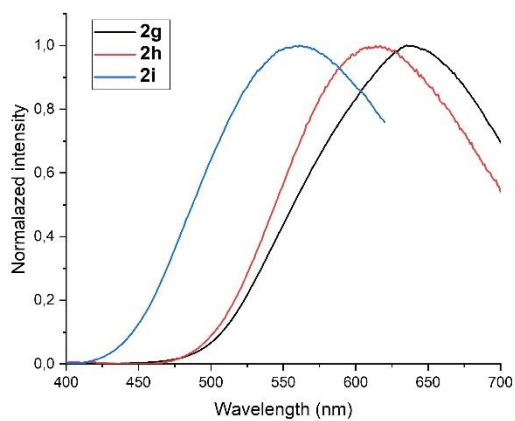

**c**

**Figure S23.** Emission spectra of compounds **2a-c** (a) **2d-f** (b) and **2g-i** (c) in MeCN.

#### 4. Emission spectra of fluorophores in solid state

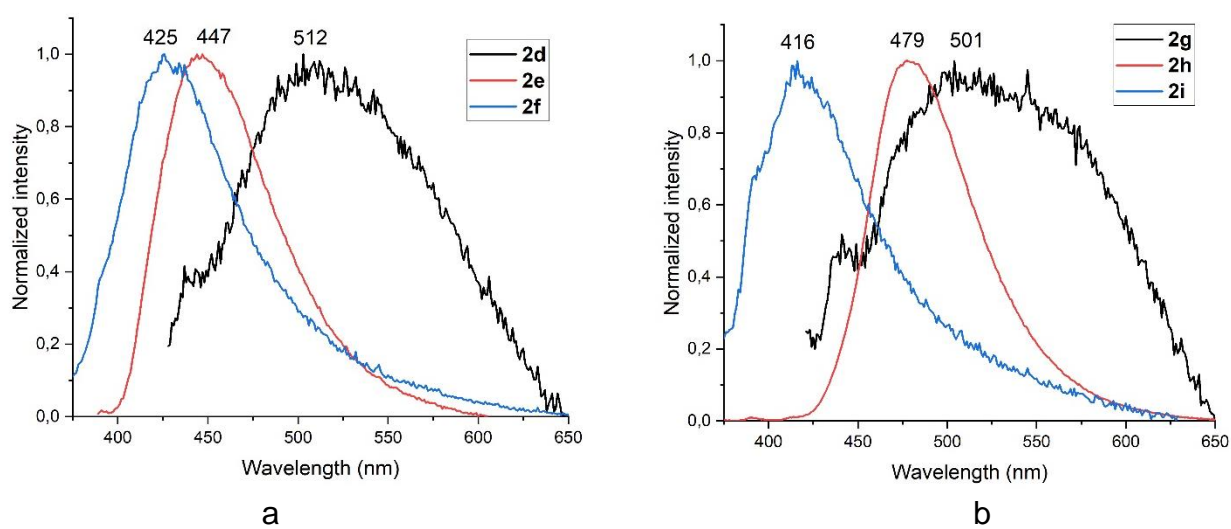

**Figure S24.** The emission spectra of compounds **2d-f** (a) and **2g-i** (b) in solid state.

## 5. Solvatochromic study for compounds 2

**Table S5.** Orientation polarizability for solvents ( $\Delta f$ ), absorption and emission maxima ( $\lambda_{\text{abs}}$ ,  $\lambda_{\text{em}}$ , nm) and Stokes shift (nm,  $\text{cm}^{-1}$ ) of **2a** in different solvents.

| Solvent     | $\Delta f$ | $\lambda_{\text{abs}}$ , nm | $\lambda_{\text{em}}$ , nm | Stokes shift, nm | Stokes shift, $\text{cm}^{-1}$ |
|-------------|------------|-----------------------------|----------------------------|------------------|--------------------------------|
| Cyclohexane | 0.001      | 353                         | 451                        | 98               | 6156                           |
| Toluene     | 0.0126     | 361                         | 491                        | 130              | 7334                           |
| THF         | 0.21       | 360                         | 553                        | 193              | 9695                           |
| DCM         | 0.22       | 364                         | 555                        | 191              | 9455                           |
| DMSO        | 0.26       | 360                         | 632                        | 272              | 11955                          |
| MeCN        | 0.3        | 356                         | 612                        | 256              | 11750                          |
| MeOH        | 0.31       | 360                         | 648                        | 288              | 12346                          |

**Table S6.** Orientation polarizability for solvents ( $\Delta f$ ), absorption and emission maxima ( $\lambda_{\text{abs}}$ ,  $\lambda_{\text{em}}$ , nm) and Stokes shift (nm,  $\text{cm}^{-1}$ ) of **2d** in different solvents.

| Solvent     | $\Delta f$ | $\lambda_{\text{abs}}$ , nm | $\lambda_{\text{em}}$ , nm | Stokes shift, nm | Stokes shift, $\text{cm}^{-1}$ |
|-------------|------------|-----------------------------|----------------------------|------------------|--------------------------------|
| Cyclohexane | 0.001      | 373                         | <b>424</b> , 452           | 71               | 3225                           |
| Toluene     | 0.0126     | 367                         | 472                        | 105              | 6062                           |
| THF         | 0.21       | 381                         | 538                        | 157              | 7659                           |
| DCM         | 0.22       | 382                         | 531                        | 149              | 7346                           |
| DMSO        | 0.26       | 384                         | 616                        | 232              | 9808                           |
| MeCN        | 0.3        | 371                         | 592                        | 221              | 10062                          |
| MeOH        | 0.31       | 375                         | 614                        | 239              | 10380                          |

**Table S7.** Orientation polarizability for solvents ( $\Delta f$ ), absorption and emission maxima ( $\lambda_{\text{abs}}$ ,  $\lambda_{\text{em}}$ , nm) and Stokes shift (nm,  $\text{cm}^{-1}$ ) of **2g** in different solvents.

| Solvent     | $\Delta f$ | $\lambda_{\text{abs}}$ , nm | $\lambda_{\text{em}}$ , nm | Stokes shift, nm | Stokes shift, $\text{cm}^{-1}$ |
|-------------|------------|-----------------------------|----------------------------|------------------|--------------------------------|
| Cyclohexane | 0,001      | 359                         | 460                        | 101              | 6116                           |
| Toluene     | 0,0126     | 371                         | 502                        | 131              | 7034                           |
| THF         | 0,21       | 366                         | 565                        | 199              | 9623                           |
| DCM         | 0,22       | 367                         | 565                        | 198              | 9549                           |
| DMSO        | 0,26       | 364                         | 643                        | 279              | 11920                          |
| MeCN        | 0,3        | 357                         | 640                        | 283              | 12386                          |
| MeOH        | 0,31       | 364                         | 651                        | 287              | 12112                          |

**Table S8.** Orientation polarizability for solvents ( $\Delta f$ ), absorption and emission maxima ( $\lambda_{\text{abs}}$ ,  $\lambda_{\text{em}}$ , nm) and Stokes shift (nm,  $\text{cm}^{-1}$ ) of **2h** in different solvents.

| Solvent     | $\Delta f$ | $\lambda_{\text{abs}}$ , nm | $\lambda_{\text{em}}$ , nm | Stokes shift, nm | Stokes shift, $\text{cm}^{-1}$ |
|-------------|------------|-----------------------------|----------------------------|------------------|--------------------------------|
| Cyclohexane | 0.001      | 380                         | <b>427</b> , <b>468</b>    | 88               | 4948                           |
| Toluene     | 0.0126     | 381                         | 473                        | 92               | 5105                           |
| THF         | 0.21       | 378                         | 546                        | 168              | 8140                           |
| DCM         | 0.22       | 378                         | 554                        | 176              | 8404                           |
| DMSO        | 0.26       | 378                         | 624                        | 246              | 10429                          |
| MeCN        | 0.3        | 371                         | 615                        | 244              | 10694                          |
| MeOH        | 0.31       | 373                         | 624                        | 251              | 10784                          |

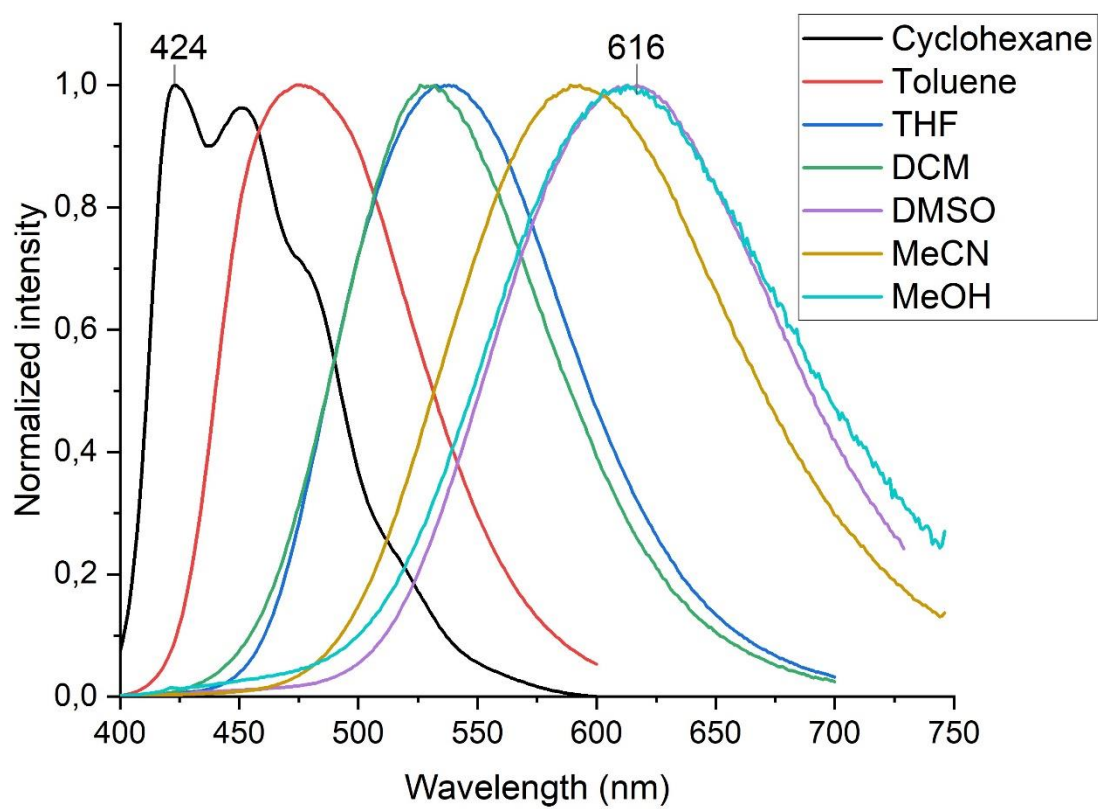

a

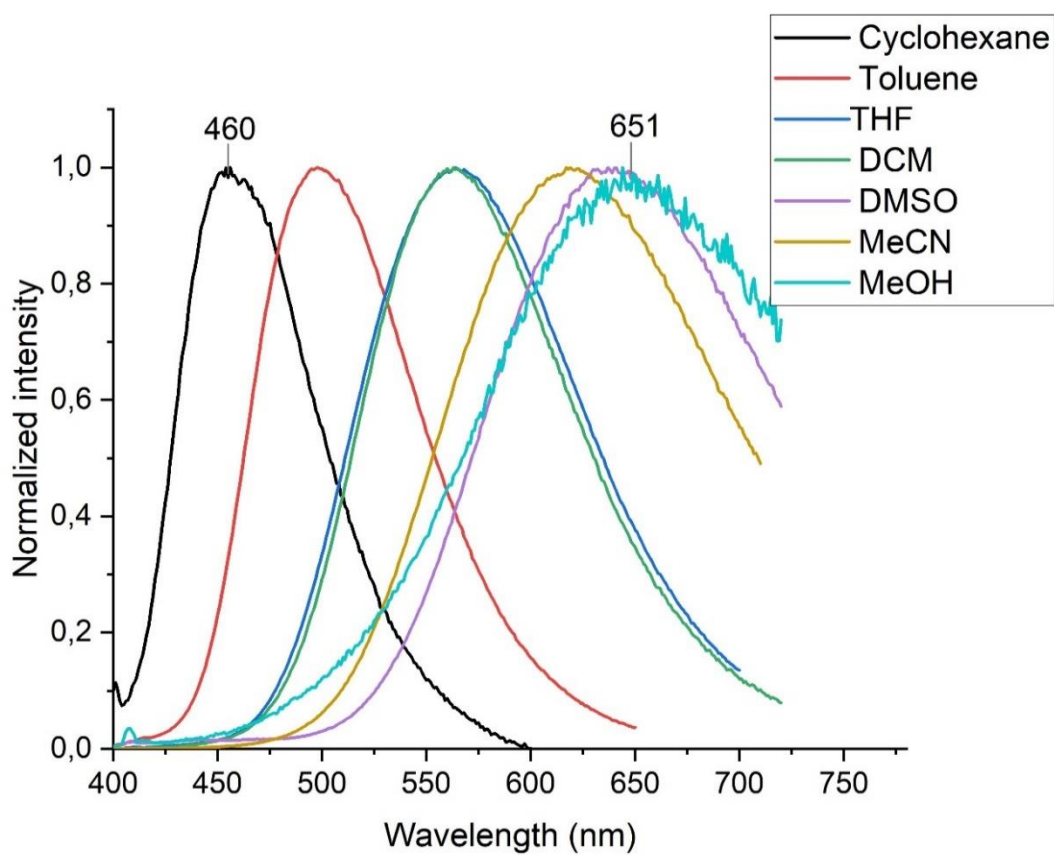

b

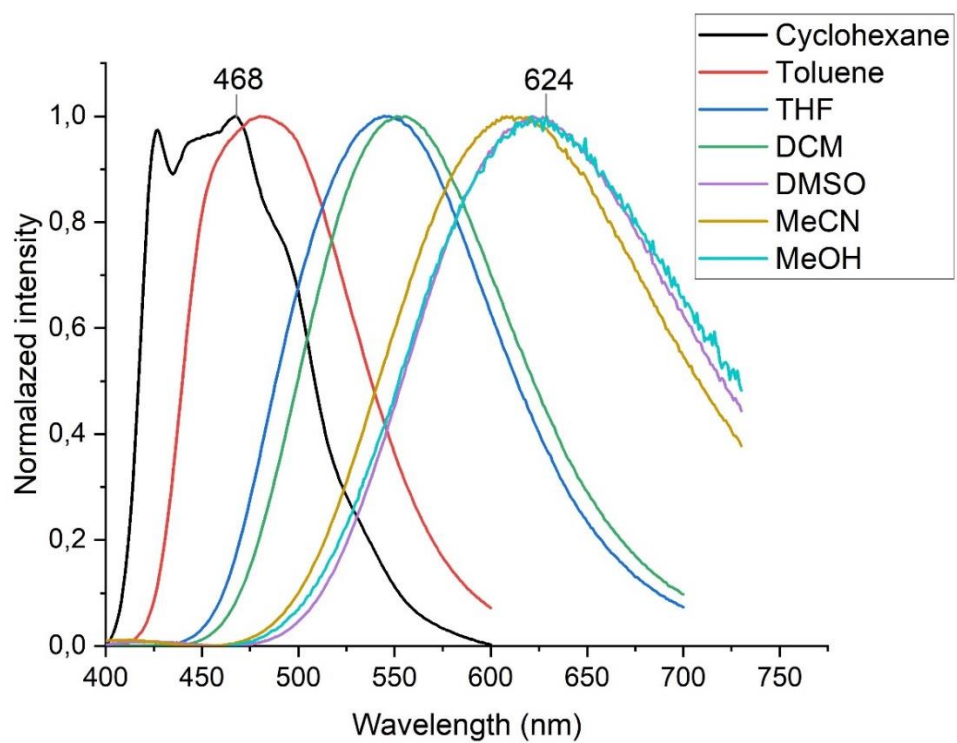

c

**Figure S25.** Fluorescence spectra of compound **2d** (a), **2g** (b) and **2h** (c) in different solvents.

## 6. Absorption and emission behavior of compounds **2** in MeCN/water mixture

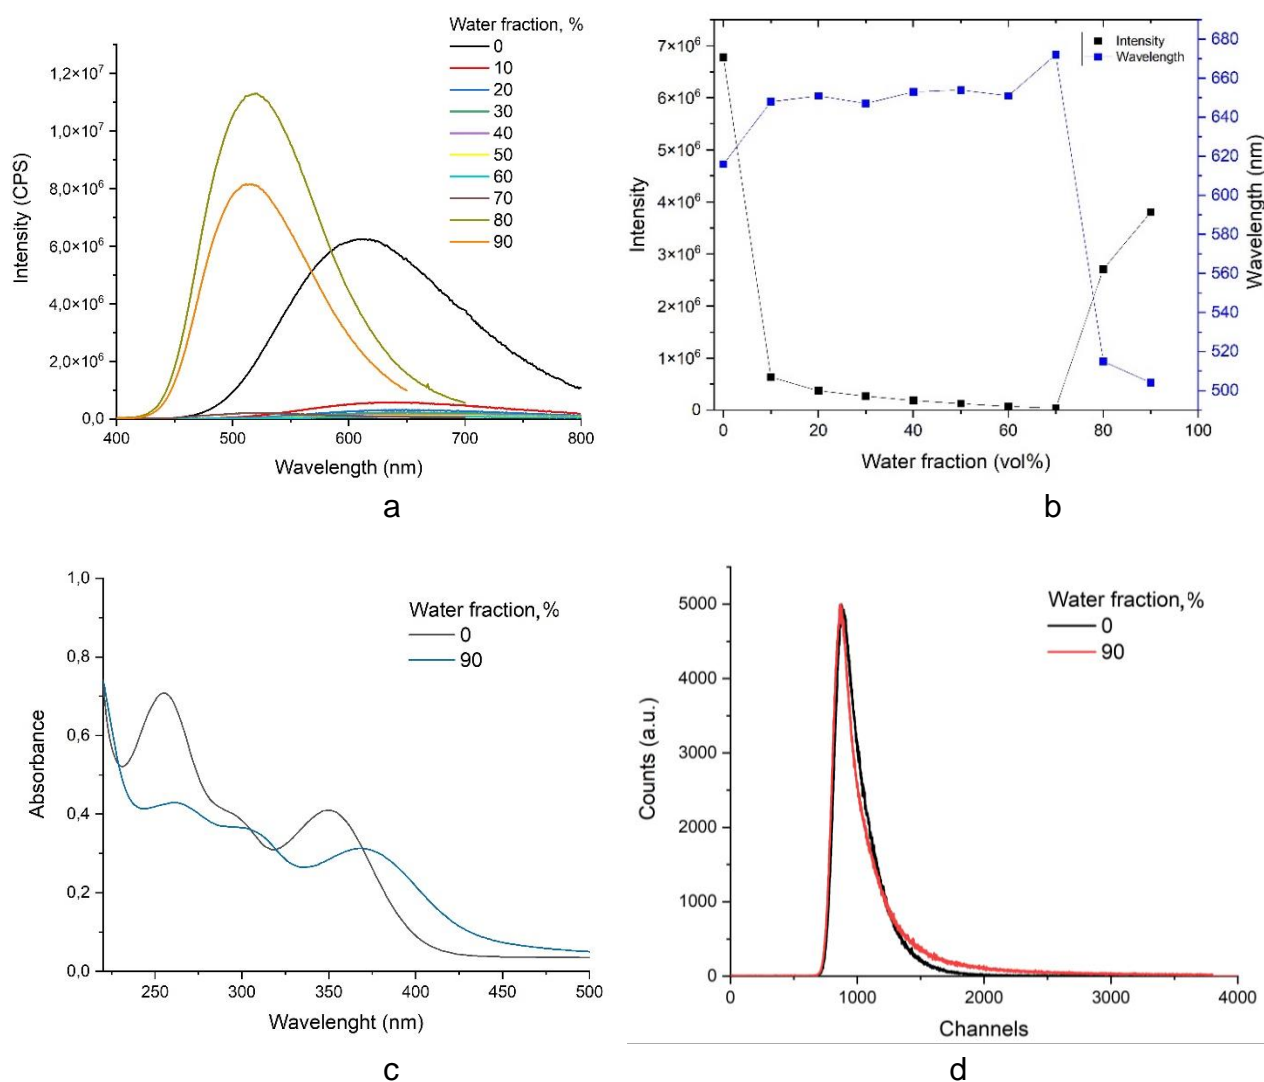

**Figure S26.** (a) The fluorescence spectra of **2b** in MeCN and MeCN/water mixtures with different water fractions ( $f_w$ ); (b) a plot of relative PL intensity ( $I/I_0$ ) and wavelength at emission maxima of **2b** versus the composition of the water fraction (vol %); (c) The absorption spectra of **2b** in MeCN and MeCN/water mixture (90%); (d) Fluorescence decay curves of **2b** in pure MeCN and MeCN/water mixture.  $T=23^\circ\text{C}$ .

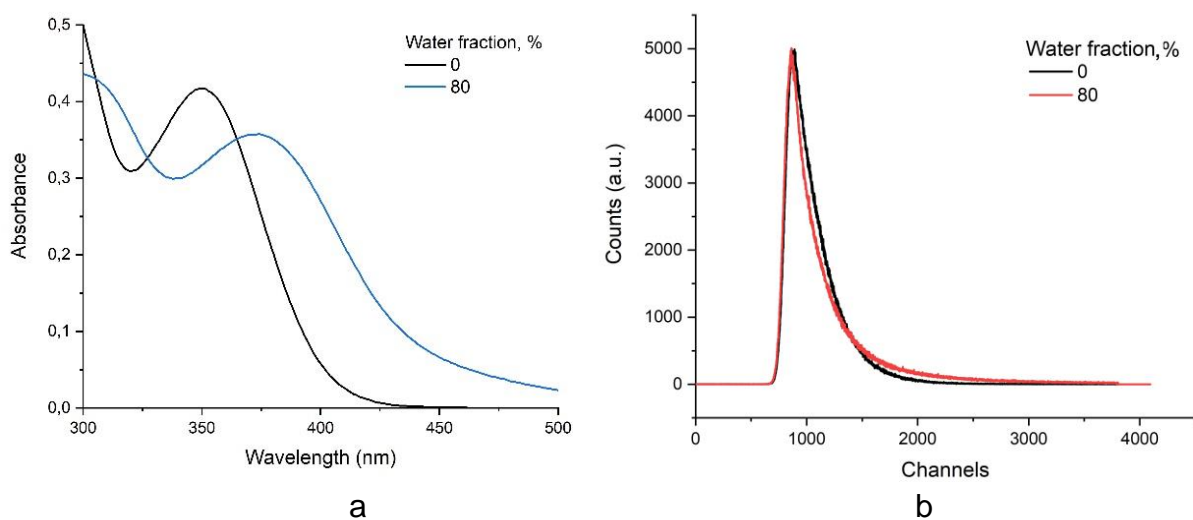

**Figure S27.** (a) The absorption spectra of **2e** in MeCN and MeCN/water mixture (90%); (b) Fluorescence decay curves of **2e** in pure MeCN and MeCN/water mixture.  $T=23\text{ }^{\circ}\text{C}$ .

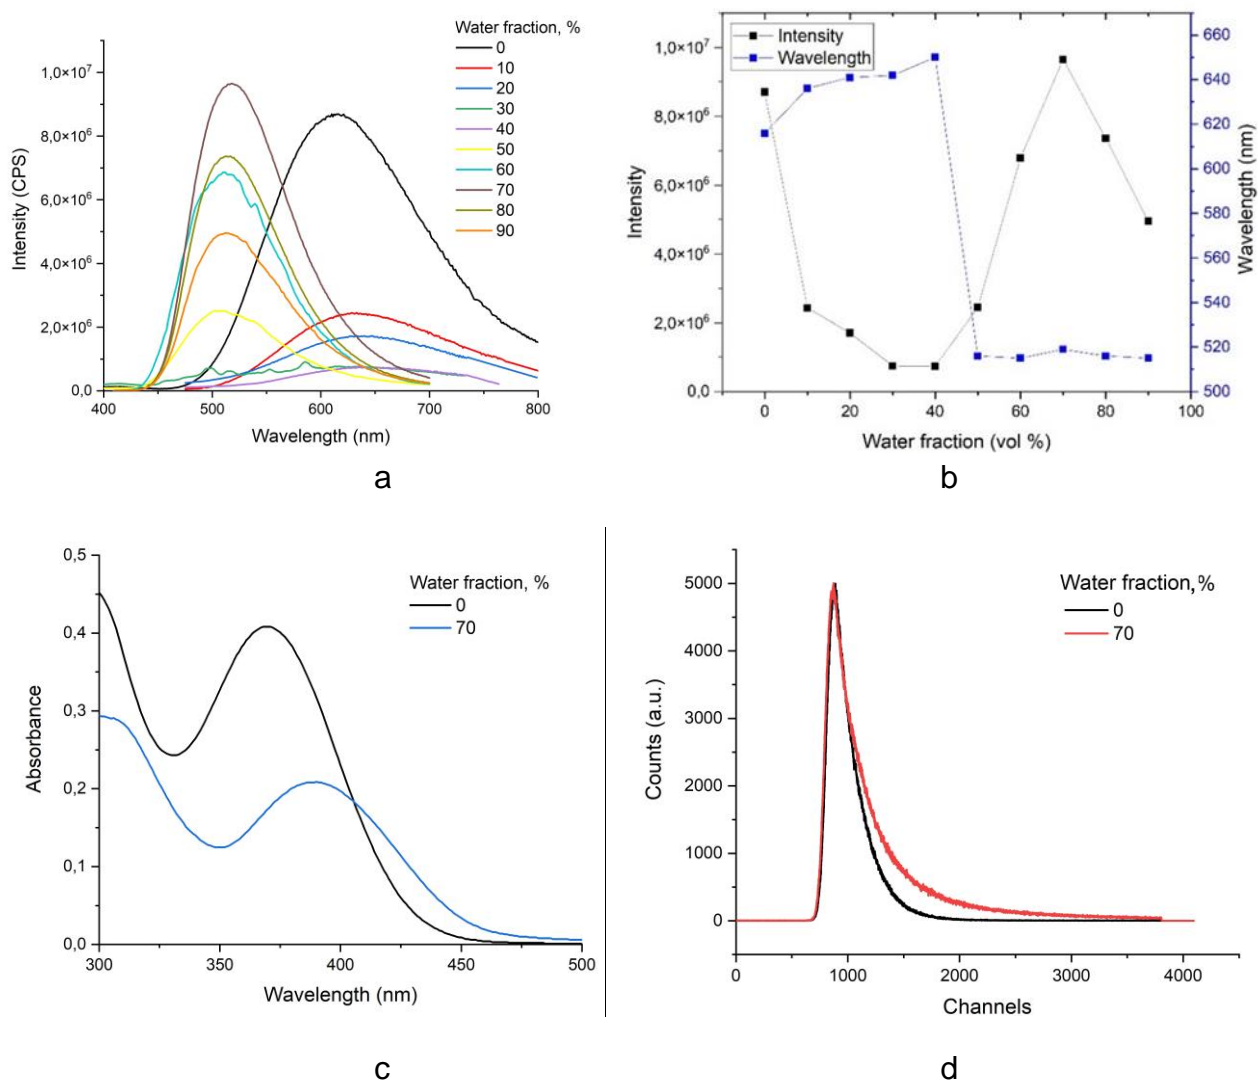

**Figure S28.** (a) The fluorescence spectra of **2h** in MeCN and MeCN/water mixtures with different water fractions ( $f_w$ ); (b) a plot of relative PL intensity ( $I/I_0$ ) and wavelength at emission maxima of **2h** versus the composition of the water fraction (vol %); (c) The

absorption spectra of **2h** in MeCN and MeCN/water mixture (90%); (d) Fluorescence decay curves of **2h** in pure MeCN and MeCN/water mixture. T = 23 °C.

**Table S9.** Detailed data of the fluorescence lifetime measurements of **2b**, **2e**, **2h**.

| Comp.     | Solvent          | $\tau_1$ , ns <sup>a</sup> | $\alpha_1^b$ | $\tau_2$ , ns <sup>a</sup> | $\alpha_2^b$ | $\tau_3$ , ns <sup>a</sup> | $\alpha_3^b$ | $\tau_{av}$ , ns <sup>c</sup> | $\chi^2$ <sup>d</sup> |
|-----------|------------------|----------------------------|--------------|----------------------------|--------------|----------------------------|--------------|-------------------------------|-----------------------|
| <b>2b</b> | MeCN             | 2.67                       | 7.35         | 2.36                       | 92.65        |                            |              | <b>2.38</b>                   | 1.1003                |
|           | MeCN/water (1:9) | 6.44                       | 25.37        | <b>2.96</b>                | <b>58.82</b> | 1.27                       | 15.81        | <b>3.57</b>                   | 1.0649                |
| <b>2e</b> | MeCN             | 3.18                       | 1            |                            |              |                            |              | <b>3.17</b>                   | 1.1831                |
|           | MeCN/water (2:8) | <b>7.76</b>                | <b>98.99</b> | 5.36                       | 0.60         | 1.51                       | 0.41         | <b>7.72</b>                   | 1.2621                |
| <b>2h</b> | MeCN             | 2.46                       | 1            |                            |              |                            |              | <b>2.46</b>                   | 1.3224                |
|           | MeCN/water (3:7) | 6.21                       | 0.26         | 1.73                       | 0.15         | <b>1.35</b>                | <b>99.59</b> | <b>1.36</b>                   | 1.2688                |

<sup>a</sup>Decay time, <sup>b</sup>Fractional contribution, <sup>c</sup>Weighted average decay time  $\tau_{av} = \sum (\tau_i \times \alpha_i)$ , <sup>d</sup>Quality of fitting

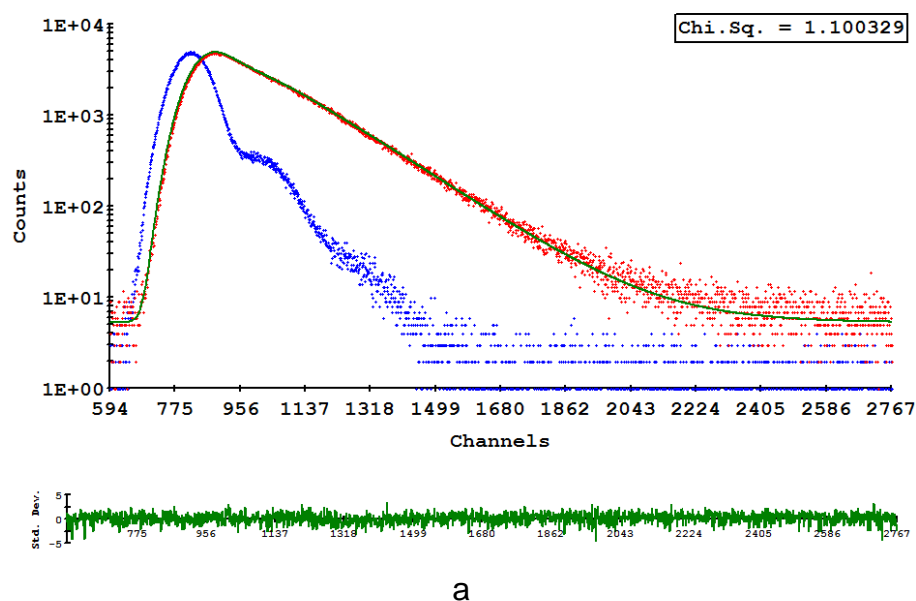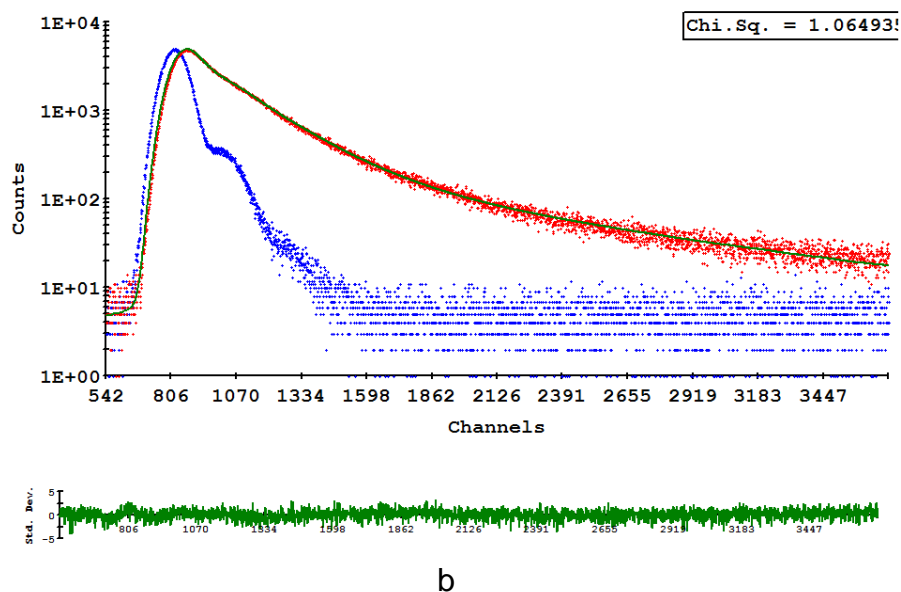

**Figure S29.** Time-resolved fluorescence lifetime decay profile of **2b** in MeCN,  $\lambda_{em} = 627$  nm (a) and in MeCN/water (90%),  $\lambda_{em} = 500$  nm (b), instrumental response function (IRF, blue).  $\lambda_{ex} = 369$  nm.

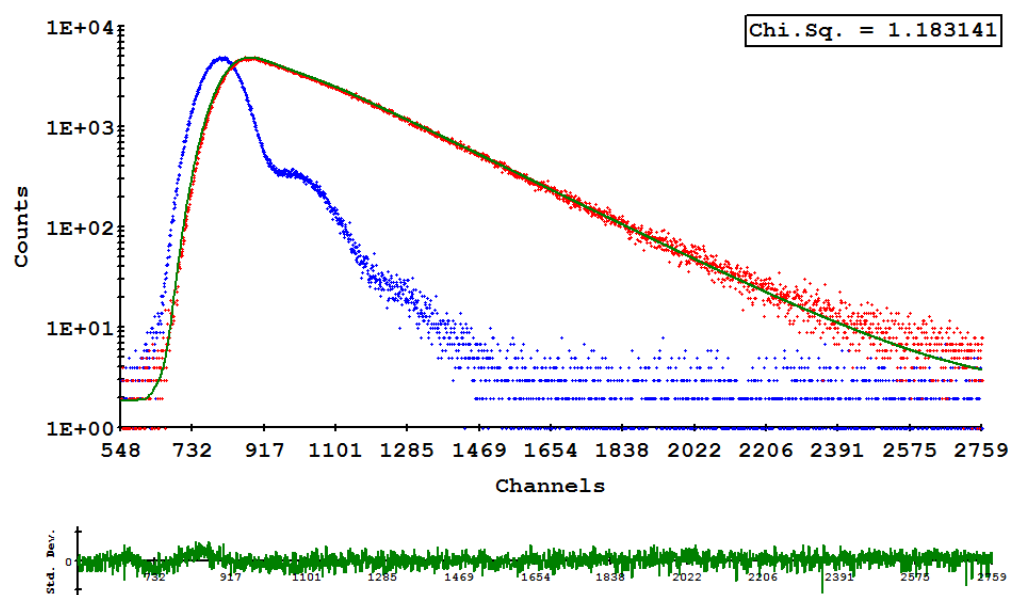

a

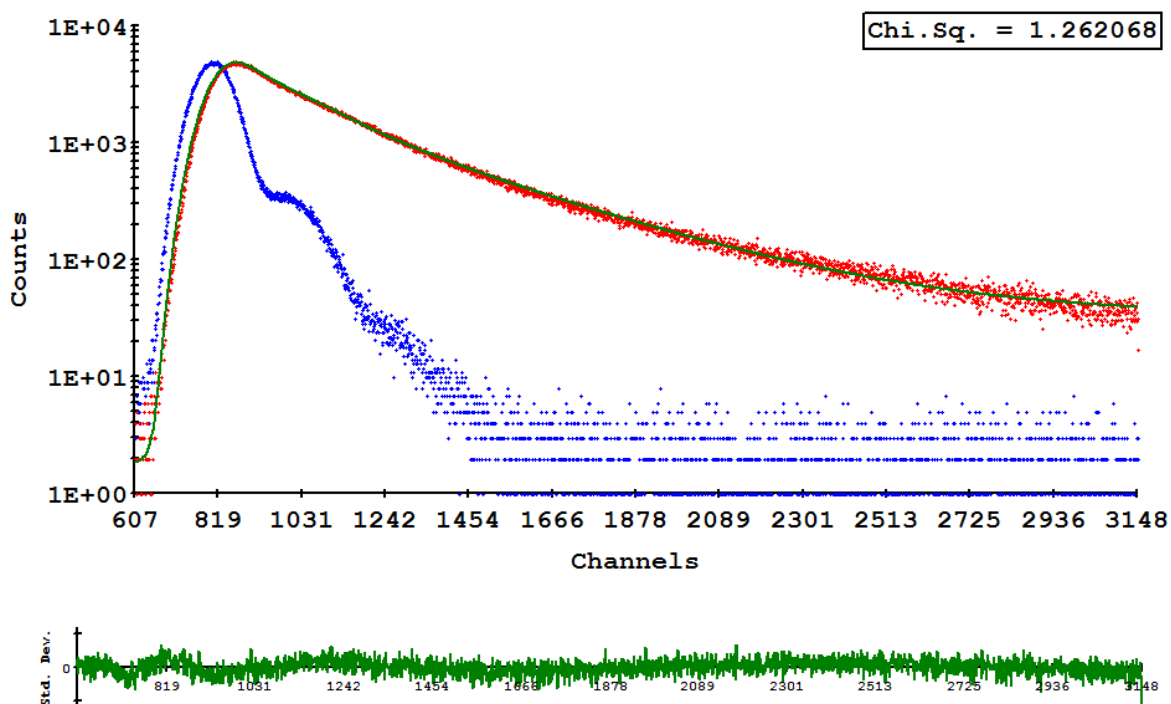

b

**Figure S30.** Time-resolved fluorescence lifetime decay profile of **2e** in MeCN,  $\lambda_{\text{em}} = 625$  nm (a) and in MeCN/water (80%),  $\lambda_{\text{em}} = 521$  nm (b), instrumental response function (IRF, blue).  $\lambda_{\text{ex}} = 369$  nm.

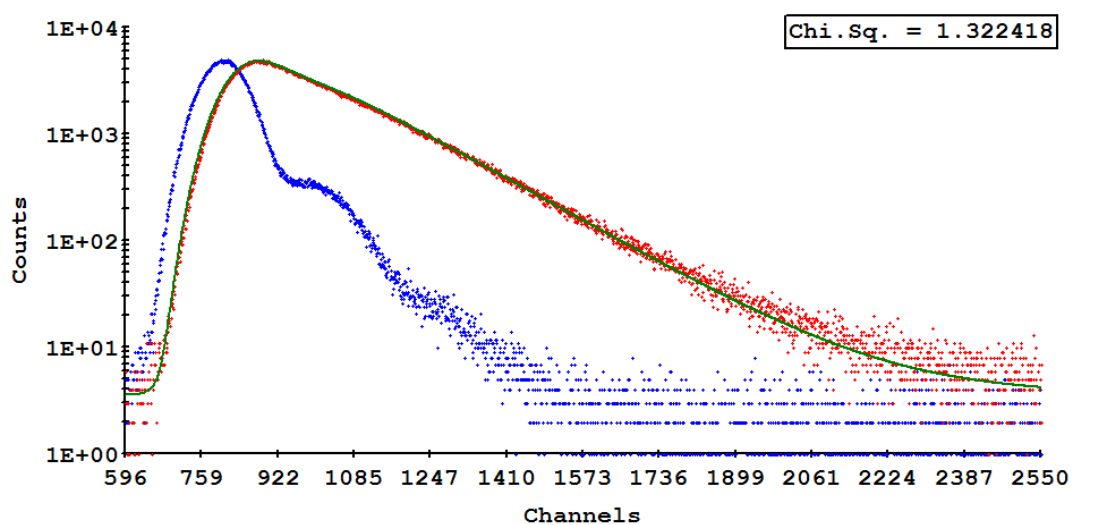

a

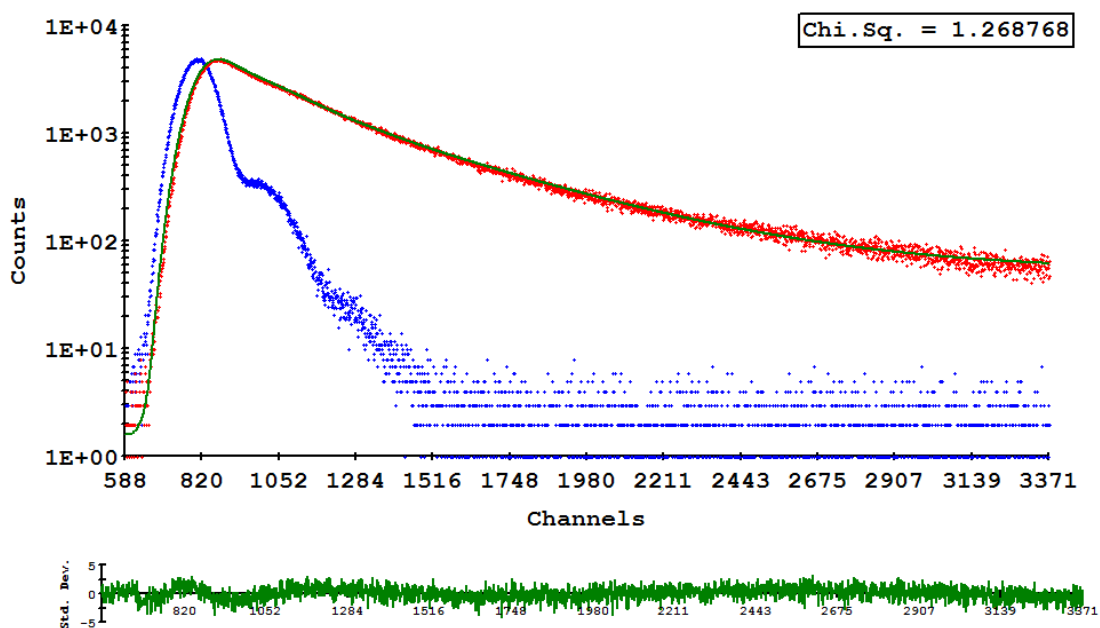

b

**Figure S31.** Time-resolved fluorescence lifetime decay profile of **2h** in MeCN,  $\lambda_{\text{em}} = 615$  nm (a) and in MeCN/water (70%),  $\lambda_{\text{em}} = 518$  nm (b), instrumental response function (IRF, blue).  $\lambda_{\text{ex}} = 369$  nm.

## 7. Absorption and fluorescence behavior of compounds **2e** and **2h** in acidic media

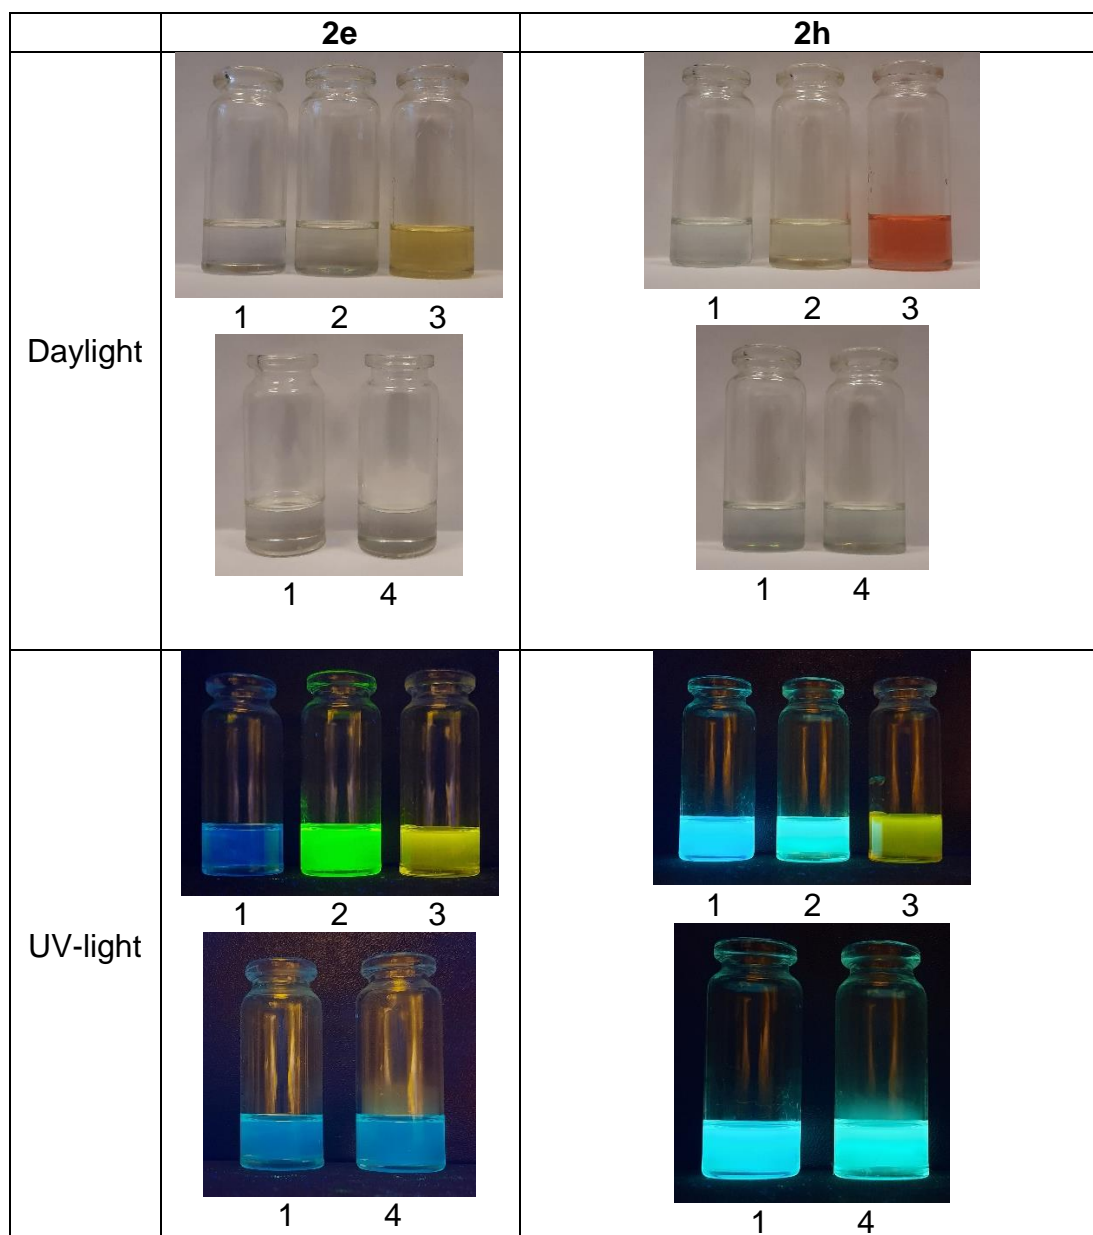

**Figure S32.** Photos of **2e** and **2h** in toluene before (1), after addition of TFA (2), after addition of excess of TFA (3) and after subsequent addition of TFA and then TEA (4) under UV-light and daylight, respectively.

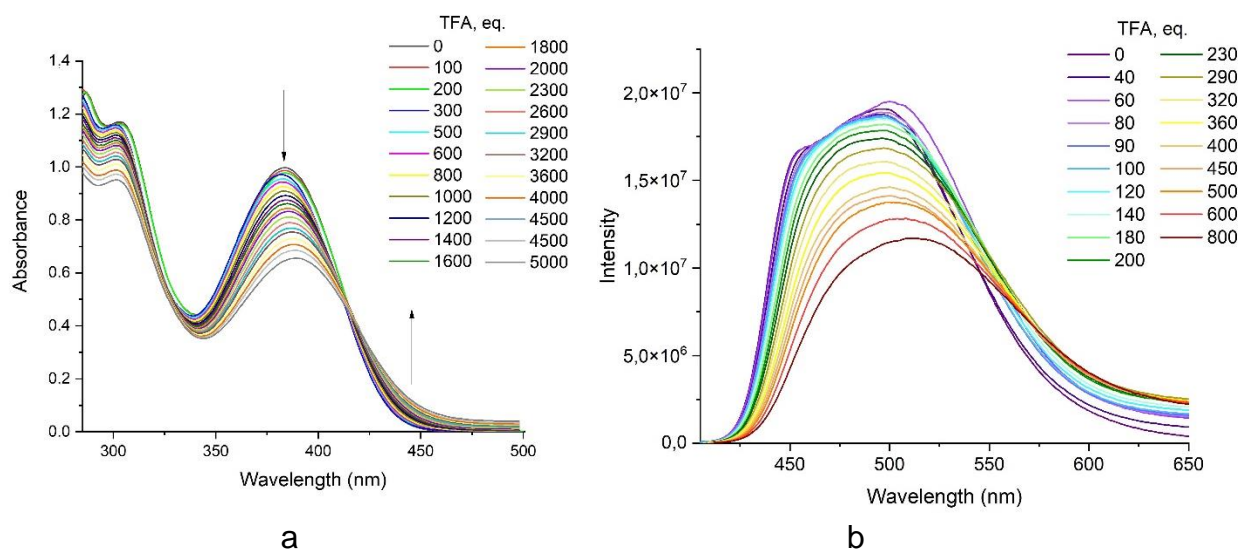

**Figure S33.** Changes in absorption (a) and emission (b) spectra of the toluene solution ( $c = 10^{-5}$  M) of **2h** upon gradual addition of TFA.
